1 **Molecular Basis of Urostyle Development: Genes and Gene**  
2 **Regulation Underlying an Evolutionary Novelty**

3  
4 Gayani Senevirathne<sup>1,2,\*</sup> and Neil H. Shubin<sup>1\*</sup>

5  
6 Affiliations:

7 <sup>1</sup>Department of Organismal Biology & Anatomy, University of Chicago, Chicago, IL 60615

8 <sup>2</sup>Department of Human Evolutionary Biology, Harvard University, Cambridge, MA 02138

9  
10 \*Corresponding author email addresses: [msenevirathne@fas.harvard.edu](mailto:msenevirathne@fas.harvard.edu)  
11 [nshubin@uchicago.edu](mailto:nshubin@uchicago.edu)

12  
13  
14 **Keywords: Hypochord, T-box genes, RNA-seq, ATAC-seq, metamorphosis**

15  
16  
17  
18  
19  
20  
21  
22  
23  
24  
25  
26  
27  
28  
29  
30  
31  
32

**ABSTRACT (200 words)**

Evolutionary novelties entail the origin of morphologies that enable new functions. These features can arise through changes to gene function and regulation. One important novelty is the fused rod at the end of the vertebral column in anurans, the urostyle. This feature is composed of a coccyx and an ossifying hypochord, and both structures ossify during metamorphosis. We used Laser Capture Micro-dissection of these identified tissues and subjected them to RNA-seq and ATAC-seq analyses at three developmental stages in tadpoles of *Xenopus tropicalis*. These experiments reveal that the coccyx and hypochord have two different molecular signatures. ATAC-seq data reveals potential regulatory regions that are observed in proximity to candidate genes identified from RNA-seq. Neuronal (*TUBB3*) and muscle markers (*MYH3*) are upregulated in coccygeal tissues, whereas T-box genes (*TBXT*, *TBXT.2*), corticosteroid stress hormones (*CRCH.1*), and matrix metalloproteinases (*MMP1*, *MMP8*, *MMP13*) are upregulated in the hypochord. Even though an ossifying hypochord is only present in anurans, this ossification between the vertebral column and the notochord appears to resemble a congenital vertebral anomaly seen prenatally in humans, caused by an ectopic expression of the *TBXT/TBXT.2* gene. This work opens the way to functional studies that help us better elucidate anuran *bauplan* evolution.

33

## INTRODUCTION

34 Phenotypic and genotypic changes from an existing ancestral condition undergird the  
35 evolution of “key innovations” (Galis and Metz 2007). Phenotypic changes of a novel structure  
36 reflect changes in the corresponding genotypic/gene regulatory networks (Shubin, Tabin, and  
37 Carroll 2009; Tarazona et al. 2016; Tschopp and Tabin 2017; Wagner 2015). Previous studies  
38 have highlighted that the anuran (frog and toad) urostyle, composed of a coccyx and a  
39 hypochord, is morphologically unique from the rest of the vertebrates because of the contribution  
40 of an ossifying hypochord, and is therefore considered a structural novelty (Senevirathne et al.  
41 2020; Handrigan and Wassersug 2007; Branham and List 1979; Kovalenko and Anisimova 1987;  
42 Kovalenko and Danilov 2006; Snell 2015). The coccyx, which is derived from the paraxial  
43 mesoderm, gives rise to the caudal vertebrae (Handrigan and Wassersug 2007; Sanchez and  
44 Sanchez 2013, 2015), which subsequently undergo endochondral ossification and fuse together  
45 during metamorphosis (Senevirathne et al. 2020). The amphibian hypochord, thought to be  
46 derived from either endoderm (Cleaver and Krieg 1998; Cleaver, Seufert, and Krieg 2000;  
47 Lofberg and Collazo 1997) or superficial mesoderm (Shook, Majer, and Keller 2004), is a thin  
48 embryonic rod, which degenerates in the rest of anamniotes during early embryonic  
49 development, but is retained only in frogs and undergoes endochondral ossification during the  
50 metamorphic climax (Handrigan and Wassersug 2007; Branham and List 1979; Kovalenko and  
51 Anisimova 1987; Kovalenko and Danilov 2006; Senevirathne et al. 2020; Snell 2015).

52 The ossifying hypochord, an apomorphic structure in anurans, occludes the dorsal aorta  
53 and is hypothesized to aid in rapid tail resorption (Senevirathne et al. 2020). We highlighted the

54 phenotypic changes associated with the evolution of this structure in anurans and discussed how  
55 bones and cartilage, muscles, neurons form, and proposed how the hypochordal ossification has a  
56 role in the evolution of the anuran *bauplan* (Senevirathne et al. 2020). Despite being derived  
57 from two different populations of cells, both coccyx and hypochord undergo endochondral  
58 ossification during metamorphosis. Undifferentiated mesenchymal cells of the coccyx and  
59 embryonic hypochordal cells chondrify and ossify when the tadpole locomotion changes from an  
60 axial-driven mode to a limb-driven one. Ossification of the hypochord is rapid, usually ranging  
61 from 6-8 days. Apart from the cartilage and bone formation, the neuro-muscular skeleton is also  
62 remodeled. The muscles near the future caudo-pelvic region of the tadpole are remodeled during  
63 metamorphosis. The primary myotomes (Dorsalis trunci) remodel to form three different types of  
64 muscles (Longissimus dorsi, Coccygeoiliacus, Coccygeosacralis), where all three muscles attach  
65 to the coccyx. The axial motor neurons in the tail degenerate, and, at the same time, the spinal  
66 cord degenerates with the fusion of the coccyx and hypochord (Senevirathne et al. 2020).

67       Embryonic hypochord in anamniotes is known to have a function in remodeling the  
68 dorsal aorta, and the hypochord degenerates (except in anurans) after serving its purpose.  
69 Surprisingly, in mature tadpoles, CT scanning data revealed a possible role of the ossifying  
70 hypochord in remodeling the dorsal aorta as well. The posterior-most end of the hypochord  
71 appears to occlude the dorsal aorta, which could aid the rapid tail loss by cutting the blood  
72 supply to the tail (Senevirathne et al. 2020). Hence, we speculated that the ossifying hypochord  
73 has a role in the evolution of the anuran *bauplan*, and this could be a reason why it has been

74 evolutionary favored in anurans for more than 200 million years (Shubin, Tabin, and Carroll  
75 2009; Shubin and Jenkins 1995).

76         The phenotypic changes of the urostyle are well studied (Branham and List 1979;  
77 Kovalenko and Danilov 2006; Senevirathne et al. 2020); however, the molecular mechanisms  
78 underlying this unique structure have remained obscure to-date. Here, we investigate  
79 transcriptomic and gene regulatory networks in the developing urostyle by combining RNA-seq  
80 and ATAC-seq approaches. Using our previous morphology work (Senevirathne et al., 2020) as  
81 a framework to identify targeted cells, we used Laser Capture Microdissection to reveal the  
82 transcriptomics and epigenomics of the two tissue types, coccyx and hypochord.

83         Mesenchymal cells in vertebrates that undergo ossification have a conserved  
84 transcriptomic signature. Vertebrate ossification can be either endochondral or intramembranous,  
85 and a compendium of genes, transcription factors, intrinsic and external cues control ossification.  
86 During this process mesenchymal cells initially condense and commit to form osteoprogenitors  
87 (genes like *SOX2*, *RUNX2* are involved in this). Next, the osteoprogenitors differentiate to form  
88 preosteoblasts and osteoblasts (BMPs, FGFs, TGF $\beta$ , and Wnt $\beta$ /catenin are involved in this (e.g.,  
89 (Horowitz 2003; Karsenty 2008; Shen et al. 2014; Sodek and McKee 2000; Stein et al. 2003),  
90 and finally, mineralization and apoptosis of osteoblasts form mature osteocytes (e.g., (Horowitz  
91 2003; Karsenty 2008; Shen et al. 2014; Sodek and McKee 2000; Stein et al. 2003).

92         Paraxial mesoderm-derived coccygeal cells are undifferentiated mesenchymal cells; they  
93 undergo chondrification and ossification prior to the initiation of the metamorphic climax  
94 (Handrigan and Wassersug 2007; Senevirathne et al. 2020) and could be following a similar gene

95 regulatory network as connective tissues and bones in vertebrates. However, the ossifying  
96 hypochord initiates ossification at the onset of metamorphosis. The origin of amphibian  
97 hypochordal cells has been hypothesized to be from the endoderm (Cleaver and Krieg 1998;  
98 Cleaver, Seufert, and Krieg 2000; Lofberg and Collazo 1997), or the superficial mesoderm  
99 (Shook, Majer, and Keller 2004). Regardless of which germ layer it is derived from, hypochord  
100 undergoes endochondral ossification only in anurans. But the genes and gene regulatory regions  
101 that control the development of this structural enigma remain unknown. Here, we compare the  
102 gene expression patterns of coccygeal and hypochordal cells to identify similar/different  
103 pathways between the two tissue types, which are derived from two different cell populations.

104 Through this work, we address the following questions: Why does the hypochord only  
105 ossify in anurans? What are the similarities/differences between the hypochordal and coccygeal  
106 molecular pathways? Which genes switch on/off during metamorphosis? By identifying the  
107 underlying changes in the genes and gene regulatory networks, our work begins to shed light on  
108 the potential genotypic changes underlying a structural novelty.

## 109 MATERIALS AND METHODS

110 Different stages of *Xenopus tropicalis* tadpoles were purchased from the National Xenopus  
111 Resource (NXR) at the Marine Biological Laboratory (MBL), Woods Hole, MA. Comparisons  
112 were made across three significant life-history stages to highlight the differences/similarities of  
113 genes and gene regulatory dynamics during metamorphosis. The developmental stages used for  
114 the experiments were as follows: before metamorphosis/prometamorphic stages (stage 56/57), at

115 the beginning of the metamorphic climax (stage 60/61), and end of metamorphosis (stage 65/66).  
116 The tadpoles were euthanized using 0.2% aqueous tricaine methanesulfonate (MS-222), and the  
117 specimens were fixed in different fixatives or fresh tissues were taken according to each  
118 experiment. Tadpoles were staged according to Nieuwkoop and Faber (NF). The codes generated  
119 for the bioinformatics analyses are deposited in GitHub  
120 ([https://github.com/GayaniSenevirathne/Senevirathne\\_et\\_al\\_RNAseq.git](https://github.com/GayaniSenevirathne/Senevirathne_et_al_RNAseq.git)) and the raw sequences  
121 are available at NCBI (Accession numbers will be given upon acceptance).

122

### 123 **RNA-seq using spatial transcriptomics and Laser microdissection (LCM)**

124 *Xenopus tropicalis* tadpoles at prometamorphosis (stage 56), beginning of the metamorphic  
125 climax (stage 60/61) and end of metamorphosis (stage 65/66) were selected as the targeted stages  
126 for the RNA-seq experiment (stages were selected based on the significant phenotypic changes  
127 that were seen at each stage during the urostyle development based on Senevirathne *et al.*, 2020).  
128 All forceps, scissors, surgical blades and lab benches were cleaned with RNase away and 100%  
129 ethanol prior to any RNA sequencing experiment. Tadpoles were euthanized using MS-222. The  
130 region where the urostyle forms (demarcated by the tenth and fourteenth myotomes;  
131 Senevirathne *et al.*, 2020) was dissected under a Leica L2 light microscope on ice-cold 1x  
132 DEPC-treated PBS; all the dissections were done on ice to prevent RNA degradation. The  
133 dissected tissue was immediately transferred to ice-cold OCT and flash frozen in liquid nitrogen  
134 and stored at -80°C (for better RNA quality, the tissue blocks were processed the subsequent  
135 day). The frozen tissue blocks were sectioned using a Leica cryostat.

136 To carry out a transcriptomic survey during urostyle development, we adapted a spatial  
137 transcriptomic approach (using Laser capture microdissection). The two targeted tissue types,  
138 coccyx and hypochord, from three individuals at each developmental stage (prometamorphosis,  
139 beginning of metamorphic climax, and end of metamorphosis) were dissected from frozen  
140 sections (Fig. 1A). The myotomic boundaries were used as a way of identifying the targeted area  
141 to be dissected out. Cells of interest were identified based on Senevirathne *et al* (Senevirathne *et*  
142 *al.*, (2020)). Prometamorphic (stage 56) sections of coccyx had undifferentiated mesenchymal  
143 cells around the spinal cord, and the hypochord had embryonic hypochordal cells ventral to the  
144 notochord. The RNA-sequencing protocol followed a spatial transcriptomics method (Geo-seq;  
145 (Chen *et al.* 2017)). Prior to sectioning, the cryostat, brushes, adjacent benches/tabletops, blades,  
146 and pencils/pens were cleaned using RNase away and 100% ethanol. The tissue blocks were left  
147 inside the cryostat for 20 minutes, allowing them to equilibrate at -20° C (not doing this resulted  
148 in flaky sections or sections breaking when transferred onto the slides). The tissues were  
149 sectioned at 16 µM thickness on to PEN membrane 1.0 slides. Five–six sections were placed on  
150 each slide and were allowed to dry at room temperature for one minute before storing them at -  
151 80°C for further processing (samples that were <1 month old were used for sectioning; the yield  
152 of RNA was high when the slides were sectioned on the same day).

153 On the day of the Laser capture microdissection, slides were removed from the freezer,  
154 thawed at room temperature for 2 minutes, and placed under an UV lamp for 2 minutes (UV  
155 helps the sections to adhere to the slide). Next, the slides were stained using Cresyl Violet to help  
156 visualize the cells. For this, slides were taken along an ethanol series, each wash was 30 seconds



157 each (100% ethanol, 70% ethanol, Cresyl Violet in 70% ethanol, and were dehydrated in 70%,  
158 90%, and 100% ethanol). Slides were allowed to dry completely before moving to the next steps  
159 (this step was important to avoid humidity affecting the RNA quality (Ordway et al. 2009).

160 The dehydrated slides were processed via LCM with the following settings: aperture (10),  
161 speed (20) and energy (50). The hypochordal and coccygeal cells were identified (histological  
162 comparisons done in Senevirathne *et al.* (Senevirathne et al. 2020) were used as a reference)  
163 using the x10 eye piece and the dissections were done using the x20. Targeted cells were  
164 captured to an adhesive cap Eppendorf tube, with the cap consisting of 50 ul of the lysis buffer.  
165 Once the cells from coccyx and hypochord were collected (~10,000 cells from 10 sections for  
166 each tissue type, 4 replicates were done for each stage, a total of 24 samples), 150ul of the lysis  
167 buffer was added to each tube and was left on ice for 20 minutes. RNA was extracted from the  
168 captured cells using the TAKARA NucleoSpin® RNA XS (Cat. No. 740902) kit with slight  
169 modifications (the filtration step was skipped). cDNA was generated using the SMART-Seq® v4  
170 Ultra® Low Input RNA Kit for Sequencing (with the number of amplification cycles set to 18).  
171 cDNA was purified using Agencourt Ampure XP magnetic beads (Beckman Coulter) and were  
172 sequenced using the HiSeq PE100.

173

#### 174 **Gene regulation and ATAC-seq**

175 The same developmental stages that were used for the RNA-seq studies were taken, and the  
176 urostyle region was dissected out as a fresh chunk of tissue (morphological demarcations of the  
177 developing urostyle were decided based on Senevirathne et al. (Senevirathne et al. 2020)). The

178 OMNI-ATAC-seq protocol was used to identify open chromatin regions in the developing  
179 urostyle (two replicates from each developmental stage, coinciding with the RNA-seq and  
180 morphological studies, were selected).

181 The tadpoles were anesthetized in MS-222, dissected on ice-cold 1X PBS and were  
182 mechanically crushed using a pestle (cleaned using 100% ethanol prior to this step) to obtain a  
183 homogenized sample (all these steps were done on ice to prevent degradation of proteins). Once  
184 a homogenized sample was obtained, cells were counted using the BioRad Tc20 automated cell  
185 counter. All samples consisted of 75,000–100,000 cells. The subsequent steps followed the  
186 OMNI-ATAC seq protocol (Buenrostro et al. 2015; Corces et al. 2017) with slight modifications  
187 using the Illumina Tagment DNA Enzyme and Buffer kit: cells were lysed in an ice-cold lysis  
188 buffer, followed by a transposition step using Tn5 Transposase, and DNA was purified using the  
189 Zymo DNA Clean and Concentrator. Purified DNA was amplified with 13 amplification cycles  
190 (the number of cycles were optimized by an additional qPCR step). Finally, the libraries were  
191 purified using the Zymo DNA Clean and Concentrator and were sequenced using the NovaSeq  
192 2000 (100BP PE).

193

#### 194 **RNA-seq analyses**

195 Three stages were targeted for all the next-generation sequencing steps – Before metamorphosis  
196 (stage 56/57), beginning of metamorphosis (stage 60/61), and end of metamorphosis (stage  
197 65/66). RNA from two different regions, coccyx and the hypochord, was extracted from three

198 individuals for each stage (18 samples). 9 samples were run per lane, using paired end 100 bp  
199 reads on a Illumina HiSeq 2000, at the Genomic core at the University of Chicago.

200           Sequence quality was checked using FastQC (version 0.11.9). (Please see Appendix A  
201 for sequence depth, Bioanalyzer results, and quality check files). *Xenopus tropicalis* reference  
202 genome v. 9.1 (*Xenopus\_tropicalis\_v9.1.dna.toplevel.fa.gz*) and transcript annotations were  
203 downloaded from Ensembl ([www.ensembl.org](http://www.ensembl.org)). Adapter sequences were trimmed using  
204 Cutadapt (version 1.8.1). Trimmed sequences were mapped using two approaches to compare the  
205 differentially expressed genes: 1. Normal alignment using HTSeq v.0.13.5 (Anders, Pyl, and  
206 Huber 2015) and Bowtie2 v.2.4.2 (Langmead and Salzberg 2012); 2. Pseudoalignment using  
207 Kallisto v.0.46.0 (Bray et al. 2016) were used to assess differentially expressed genes across  
208 tissues and developmental time points. Counts for HTSeq2 and Bowtie2 alignment files were  
209 obtained using HTSeq-counts computed for the *Xenopus tropicalis* v.9 annotations. Kallisto  
210 counts were also used as a comparison method. The subsequent steps are for the aligned  
211 transcripts obtained from the HT-seq2 step. The differential gene expression between the two  
212 tissue types (coccyx and hypochord), three developmental stages, and three biological replicates,  
213 were analyzed using the DESeq2 (Love, Huber, and Anders 2014) package (v.3.12) from  
214 Bioconductor. The dataset consisted of a total of 18 libraries (9 individuals, 3 replicates, 2 tissue  
215 types, 3 stages), differentially expressed genes were looked for either between stages (e.g.,  
216 prometamorphosis vs beginning of metamorphic climax) or between the two tissue types (e.g.,  
217 coccyx vs hypochord). A DESeq2 negative binomial generalized linear model was adapted,  
218 which has been highlighted in previous studies (Love, Huber, and Anders 2014) as a robust

219 method for identifying differentially expressed genes (DEGs). DESeq2 package was used in R to  
220 normalize the reads, and the reads were subjected to variance stabilizing transformation using the  
221 “vst” function. A principal component analysis (PCA) was carried out using the DESeq2  
222 function “plotPCA” to observe the clustering of the 18 samples. Hypochord and coccyx show  
223 considerable differences in cellular composition and differentiation (Senevirathne et al. 2020),  
224 and the gene expression profiles directly reflect this (Fig. 1C). A False Discovery Rate (FDR)  
225 value of <0.05 was used as the statistical significance threshold. DEG comparisons were  
226 depicted in three ways: prometamorphosis vs beginning of metamorphic climax; beginning of  
227 metamorphic climax vs end of metamorphosis; coccyx vs hypochord. The results of the DEG  
228 experiments were visualized in three main ways: 1. heatmaps were generated from the lists  
229 (Appendices C, D and Tables 3.1 and 3.2) of significant genes using the normalized values.  
230 Differences in expression data were visualized using z-scores calculated for each gene (=each  
231 row); 2. Volcano plots were drawn highlighting the up/down regulatory genes in the DEGs.  
232 Here, log-transformed p-values (y-axis) were plotted against the log2 fold change (x-axis); 3.  
233 Narrowed down gene symbols of the DEGs were used for GO enrichment analysis. The  
234 reactome web-based analysis tool was used to determine the overrepresentation of Reactome  
235 pathways where the up/down regulatory gene lists (Appendices C,D,E and F), genes within the  
236 intersections of the Venn Diagrams (drawn using the package “VennDiagram”) were given as  
237 inputs.

## 238 **ATAC-seq analyses**

239 Adapter sequences were trimmed from the raw paired end 100-bp files using NGmerge (Gaspar  
240 2018) and the trimmed sequences were aligned to the *X. tropicalis* reference genome v. 9.1  
241 (Xenopus\_tropicalis\_v9.1.dna.toplevel.fa.gz) using Bowtie2. Duplicated reads were removed  
242 from the subsequent analyses using Picard (<http://broadinstitute.github.io/picard/>). Peaks were  
243 called using MACS2 (Zhang et al. 2008) (--nomodel --extsize 200 --shift -100 --nolambda) and  
244 Genrich (-e chrM -r -j). Two peak callers were used to compare the peaks, where Genrich's "j"  
245 command specifically signifies the ATAC-seq mode. Irreproducible discovery rate (IDR) <0.01  
246 was used as the threshold to screen the replicate samples. Here, the IDR method compares  
247 ranked peak lists to identify overlapping peaks. Finally, the peak files were directly uploaded to  
248 Integrative Genomics Viewer (IGV) and were visualized along with their respective. bam and  
249 bam index files.

250

### 251 **HCR *in-situ* hybridization**

252 Targeted urostyle tissues were fixed in 4% PFA, dehydrated in a methanol series, and stored at -  
253 20° C until future use. On the day of sectioning, tissues were rehydrated using an ethanol series,  
254 rinsed in histosol, and subsequently, washed and mounted in paraffin. The microtome, brushes,  
255 bench/tabletops were cleaned using RNase away and 100% ethanol and the tissue blocks were  
256 sectioned to obtain 12 uM-thickness paraffin sections. Paraffin sections can be stored at room  
257 temperature, indefinitely, until the day of staining.

258 For HCR *in-situ* hybridization (Yamaguchi et al. 2015) of paraffin sections (the protocol  
259 followed <https://www.molecularinstruments.com/protocols> with slight modifications), the

260 sections were initially dewaxed using histosol, re-hydrated in ethanol, and treated with a  
261 Proteinase K/PBS solution to increase the tissues' permeability. Prehybridization step was  
262 followed by the addition of the targeted probe (1  $\mu$ M probe/100 ul of hybridization buffer) and  
263 leaving the slides in a 37° C incubator overnight. Next day, the slides were washed in the wash  
264 buffer and subjected to an amplification buffer with hairpins overnight. On the third day, the  
265 slides were washed using dilution a series of SSCT, mounted using Fluoromount G + DAPI, and  
266 visualized using a Zeiss LSM 710 confocal microscope. The results were analyzed using Fiji  
267 image analysis software.

268

269

### 3.4 – RESULTS

#### 270 **Disparity in gene expression profiles of the Coccyx and Hypochord**

271 At the beginning of metamorphic climax (stage 60/61) both hypochordal and coccygeal cells  
272 underwent chondrogenesis and osteogenesis (dissected cells at this stage included immature  
273 chondrocytes, mature chondrocytes, osteocytes, mesenchymal cells, and extracellular matrix)  
274 (Fig. 1A and 2). At the end of metamorphosis, coccygeal and hypochordal cells completed  
275 ossification, and the majority of the cells consisted of osteocytes, osteoblasts, and mature  
276 chondrocytes. The two tissue types fuse at the end of metamorphosis, coinciding with the  
277 degeneration of the notochord. The total analysis consisted of 21458 genes, out of which 3286  
278 genes exhibited considerable variation between the two tissue types across development (the  
279 FDR <0.05); both tissue types and the three timepoints were used as factors in the DESeq2

280 analysis where a binomial generalized linear model was implemented. Principal component  
281 analysis (PCA) revealed that the coccygeal and hypochordal samples generate two separate  
282 clusters (Fig. 3B), and a heatmap showed the two tissue types possess two different gene  
283 expression profiles (Fig. 3C). 3298 genes were differentially expressed between the urostyle and  
284 hypochord, whereas 1845, 385 and 3434 genes were differentially expressed between the  
285 prometamorphic vs beginning of metamorphic climax, beginning of metamorphic climax vs end  
286 of metamorphosis, and prometamorphosis vs end of metamorphosis, respectively. Among these  
287 DEGs, 2828 genes were significantly upregulated and 470 were downregulated in the coccygeal  
288 region compared to hypochord. During coccygeal development, several modifications happen  
289 around the areas of interest. The coccyx develops dorsal to the notochord and around the spinal  
290 cord, initially as two ossification centers, which later fuse together during metamorphosis.  
291 Concomitantly, muscles and neurons around the coccyx remodel. Primary myotomes remodel  
292 into secondary muscles and attach to the coccygeal bone. The spinal cord degenerates and axons  
293 project outwards from the coccygeal spinal foramina (Senevirathne et al. 2020). These  
294 phenotypic changes are reflected in the underlying gene regulatory networks. The majority of the  
295 upregulated genes in the coccygeal tissue samples are involved in differentiation and  
296 development of the nervous system (e.g., *NEUROD6*, *PRDM12*, *COCH*, *APBA2*)  
297 (Uittenbogaard, Baxter, and Chiaramello 2010; Rahman et al. 2020), or are genes that are  
298 expressed during skeletal muscle development (e.g., *ACTN2*) (Mills et al. 2001). Apart from  
299 these, the rest of the upregulated genes within coccygeal tissues are directly involved in

300 chondrocyte/osteocyte differentiation (e.g., *RUNX2*, *COL9A1*, *SOX8*) (Fig. 3) (Youlten et al.  
301 2020; Qin et al. 2020).

302 Embryonic hypochordal cells are thought to have an endodermal (Cleaver and Krieg  
303 1998; Cleaver, Seufert, and Krieg 2000; Lofberg and Collazo 1997; Senevirathne et al. 2020) or  
304 a superficial mesodermal origin (Shook, Majer, and Keller 2004). Whether it is endoderm- or  
305 superficial mesoderm-derived, a cell population that is completely different from the sclerotomal  
306 cells (of the coccyx) forms the ossifying hypochord and contributes to the adult axial column.  
307 Hence, this unusual ossification of the hypochord, seen only in anurans (ranging from the  
308 myotome 10–14), is considered an apomorphic state, compared to the rest of the vertebrates.  
309 Embryonic hypochordal cells undergo chondrification and ossification as soon as the tadpole  
310 reaches its metamorphic climax. The transcriptomic assay between the two tissues revealed that  
311 hypochordal tissues express high concentrations of *TBX1*, *TBXT.1*, *TBXT.2*, and *HAND2* (Fig.  
312 3C). T-box genes are involved in early mesodermal patterning and their expression has not been  
313 recorded in adult tissues before (explained in detail in a subsequent section; 3.4.3). Here, we  
314 hypothesize three possible scenarios: if the hypochordal cells are of endodermal origin, the  
315 increased *TBXT/TBXT.2* could be initiating a cell-fate switch from endoderm-to-mesoderm (there  
316 are some instances where T-box genes have been recorded to enable a cell-fate switch e.g.,  
317 (Chapman et al. 2003)). To the best of our knowledge, there are no other studies looking into the  
318 possibility of an endoderm-derived tissue undergoing ossification. Secondly, if the hypochordal  
319 cells are superficial mesoderm derived, *TBXT* and *TBXT.2* could be activating the downstream  
320 targets involved in cellular matrix organization (seen by the up-regulated expression patterns of



321 *MMPI*, *MMP8*; Fig. 3) and chondrification. Thirdly, another possibility is that the ossification of  
322 the hypochord could resemble an epithelial-to-mesenchymal transition (EMT). During EMT, the  
323 epithelial cells adapt a morphology similar to fibroblasts and acquire migratory properties (at the  
324 same time the epithelial cells lose adhesion to the surrounding extracellular matrix) (Radisky  
325 2005). Several studies hypothesize how Brachyury (*TBXT/TBXT.2*) plays a pivotal role in  
326 EMT, where overexpression of Brachyury would induce mesenchymal properties, and reduce  
327 epithelial properties, in the migrating epithelial cells (Behr et al. 2005; Fernando et al. 2010).  
328 This phenomenon has led to abnormal ossifications in the vertebral column (i.e., vertebral  
329 column chordomas, where some are observed between the notochord and vertebral column)  
330 (Chen et al. 2020; Vujovic et al. 2006; Zhu, Kwan, and Mackem 2016). There are endothelial  
331 cells lying between the embryonic hypochord and endoderm (where the dorsal aorta runs  
332 between these two tissues) (Senevirathne et al. 2020). Hence, the increased expression of  
333 *TBXT/TBXT.2* in hypochordal cells could potentially lead to increased mesenchymal properties  
334 and eventually activate chondrifying and ossifying genes.

335 T-box genes have already been identified as being pivotal components in the  
336 differentiation of the posterior axial column (Chen et al. 2020; Cunliffe and Smith 1994, 1992;  
337 Gentsch et al. 2018; Ghebranious et al. 2008; Hayata et al. 1999; Hotta et al. 2000; Messenger et  
338 al. 2005; Schulte-Merker and Smith 1995; Vujovic et al. 2006; Wan et al. 2016), and seem to be  
339 playing a role in hypochordal ossification as well. However, all the three scenarios explained  
340 above, would require the activation of T-box genes at the onset of metamorphosis because of  
341 extrinsic/intrinsic signals, which could be either hormonal or environmental.

342           The pelvic region undergoes dramatic changes during metamorphosis, and this period is  
343 thought to represent the developmental stage that is most susceptible to predation. The  
344 underlying stress of the remodeling tissues and hormonal responses can also be seen by the  
345 increased expression of *CRCH.1* (corticosteroid stress hormones), having a normal hormonal  
346 response to stress. Other than these genes, the hypochord also expresses significant  
347 concentrations of *VEGF* and *HAND2*. These two genes are involved in vascular development and  
348 can also be seen expressed in embryonic hypochord where *VEGF* plays a role in the formation of  
349 the hypochord (e.g., (Cleaver and Krieg 1998; Cleaver, Seufert, and Krieg 2000; Cleaver et al.  
350 1997)). Our previous work (Senevirathne et al. 2020) showed how the ossifying hypochord may  
351 also play a role in modifying the dorsal aorta by occluding it at the posterior-most end of the  
352 hypochord and remodeling it to form two branches, which enter the fore- and hind limbs  
353 respectively.

354

### 355 **Transcriptomic differences across different time points during urostyle development**

356 The coccygeal and hypochordal tissues chondrify and ossify during development. At the end of  
357 metamorphosis, coinciding with the degenerating notochord, they fuse together to form the  
358 urostyle. We next delved into identifying genes that switch on/off during metamorphosis and  
359 highlight DEGs that are expressed at each time point: before metamorphosis, beginning of  
360 metamorphic climax, and end of metamorphosis.

361           There are numerous studies of metamorphic transcriptomes (e.g., (Brown and Cai 2007;  
362 Callery and Elinson 2000; Zhao et al. 2016; Wang et al. 2019; Yaoita and Brown 1990;

363 Kanamori and Brown 1996; Brown et al. 1995)), but none on the urostyle. We first looked into  
364 urostyle-responsive transcriptomes by comparing genes that are differentially expressed in the  
365 coccyx and hypochord at different time points: 1. Before metamorphosis vs beginning of  
366 metamorphosis (electronic supplementary material, figures S1B, S2 and S3) and  
367 before/beginning of metamorphosis vs end of metamorphosis (electronic supplementary material,  
368 figure S1A). This analysis identified 5664 number of DEGs that fell within the thresholds of  
369  $FDR < 0.01$  (adjusted p-values  $< 0.05$  and log fold change of 1.5) and showed unique expression  
370 patterns that were significant at each time point.

371 Several unique sets of genes were up- and down-regulated across the three developmental  
372 time points (Fig. S1). Through this step, we identified 4 unique clusters when the transcriptomes  
373 were compared between the three developmental time points (before and beginning of  
374 metamorphosis vs end of metamorphosis (electronic supplementary material, figure S1). Cluster  
375 A has 47 genes that were highly downregulated at the end of metamorphosis (“switched off”)  
376 compared to the other two time points. This cluster includes genes involved in muscle  
377 contraction and M-band stabilization in fast skeletal muscles (e.g., *TRDN* and *MYOM2I*;  
378 (Giacomazzi et al. 2017; Auxerre-Plantie et al. 2020)), skeletal development (e.g., *SOX9* (Hattori  
379 et al. 2010)), response to inflammation (*PTX3*; (Magrini, Mantovani, and Garlanda 2016)),  
380 filament organizing genes (e.g., *KRT18.I* and *VIM.2*; (Velez-delValle et al. 2016; Gan et al.  
381 2016)), extracellular matrix organizing and connective tissue-strengthening (e.g., *COL9A1*,  
382 *COL8A1*, *CHAD*; (Brachvogel et al. 2013; Hessle et al. 2014)), and stress regulation (*CRCH.1*;  
383 (Reul and Holsboer 2002)). The other two gene clusters, B and C (electronic supplementary

384 material, figure S1A), comprise genes that are both down- and up-regulated at the end of  
385 metamorphosis. Cluster C also has 15 genes that are downregulated at the end of metamorphosis,  
386 which include collagen markers (e.g., *COL9A3*), and skeletal muscle function genes (e.g., *MYL1*  
387 and *ACTN3*; (Schiaffino et al. 2015; Pickering and Kiely 2017)). Genes that are up-regulated (10  
388 genes) are within Cluster B and are involved in mitosis (*CCNBI*; (Strauss et al. 2018)),  
389 development of neurons (*POU3F1*; (Zhu et al. 2014)) and maintenance of myelin sheath (*PLP1*;  
390 (Gould et al. 2008)). When before metamorphosis was compared with beginning/end of  
391 metamorphosis, clustering of the 100 top-most significant genes revealed metamorphic genes  
392 that were switched off before metamorphosis but were switched on during metamorphosis.  
393 Heatmap clustering revealed five main clusters (electronic supplementary material, figure S1B).  
394 Cluster A included 28 genes that were downregulated (switched off) before metamorphosis in  
395 both coccyx and hypochord, but as soon as metamorphosis was initiated, these genes were  
396 upregulated; they are involved in functions like collagen synthesis (*SERPINH1*; (Widmer et al.  
397 2012)), cell cycle (*CDK6*; (Tigan et al. 2016)), and thyroid hormone inactivation (*DIO3*; (Bianco  
398 and da Conceicao 2018)). Cluster B and C includes genes that are switched on prior to  
399 metamorphosis and are switched off at the onset of metamorphosis: *HES8*, *FOXP2*, *EGR1*,  
400 *HOXD11*, and *PVALB* are representative examples. Cluster D is enriched with genes that are  
401 involved in blood sugar control (e.g., *THRAP3*, *IGF2BP3*; (Choi et al. 2014; Dong et al. 2017)),  
402 which are down-regulated before metamorphosis but are up-regulated at the onset of  
403 metamorphosis. This part of the transcriptomic analysis identified DEGs that are specific to the  
404 three significant time points (before metamorphosis vs onset of metamorphosis vs end of

405 metamorphic climax). We next explored the GO function of these significant genes during  
406 development. The DEGs and the corresponding P-values from the differential expression  
407 analyses were imported into an online database of reactome pathways (“Reactome pathway  
408 browser”) to compare the functional aspect of these genes (electronic supplementary material,  
409 figure S2). DEGs up regulated before metamorphosis were enriched for GO terms like “DNA  
410 replication and pre-initiation”, “synthesis of DNA”, “Polymerase switching”, “G1/S transition”  
411 (Fig 3.5.B). Whereas the DEGs up regulated during metamorphosis include genes that function  
412 in “Collagen formation”, “Cross linking of collagen fibrils”, “*RUNX2* regulated bone  
413 development”, and “Osteocyte differentiation” (Fig 3.5.C and D).

414 Morphological analyses highlighted that both urostyle and hypochord undergo  
415 endochondral ossification during development (Senevirathne et al. 2020), and similar ossification  
416 patterns were reflected in the gene expression profiles as well. Though there were major  
417 differences in some transcriptomes (e.g., presence of T-box genes, *CRCH.1*, *MMPs* in  
418 hypochordal tissues at the onset of metamorphosis vs absent in the coccyx), there were  
419 similarities in genes that were involved in endochondral ossification: we show that genes that are  
420 involved in cartilage and bone formation, extracellular matrix organization, and thyroid hormone  
421 responsive elements are present in both tissues (electronic supplementary material, figure S2),  
422 but differ temporally (coccyx starts ossifying after 1.5 months, whereas the hypochord initiates  
423 its ossification only at the onset of metamorphosis).

424

425 **Hypochord, metamorphosis and T-box genes**

426 The ossifying hypochord in anurans is considered an unique feature. As there is no data on the  
427 genes that are expressed during hypochordal ossification, we used the DEGs identified by the  
428 coccyx vs hypochord comparisons (section 3.4.1) to scrutinize this. This analysis identified 470  
429 genes that were uniquely up-regulated only within the hypochordal tissues (they fell within the  
430 significant threshold of adjusted p-value <0.05 and FDR<0.01) (Appendix B). Compared to the  
431 coccyx, we identified DEGs that were only present in the hypochord (Table 3.2). Out of these,  
432 here, we will be focusing on the highly expressed T-box (*TBXT.1*, *TBXT.2*, *TBX1*) genes that are  
433 only seen in the hypochordal tissues in this section.

434 T-box genes have been implicated in early mesodermal patterning and, especially,  
435 *Brachyury/Xbra* is essential in early mesodermal formation (Cunliffe and Smith 1994, 1992;  
436 Hayata et al. 1999; Messenger et al. 2005; Smith et al. 1991), and *Brachyury* homologues across  
437 vertebrates induce the mesoderm (Schulte-Merker and Smith 1995; Yasuoka, Shinzato, and  
438 Satoh 2016). *Xenopus* has two paralogues of the gene *Brachyury*: *TBXT.1* (also known as *Xbra* or  
439 *T*) and *TBXT.2* (also known as *Xbra3* or *T2*). When *Brachyury* is knocked out, it causes loss of  
440 posterior mesoderm and failure to differentiate the notochord (Gentsch et al. 2018; Paraiso et al.  
441 2019). *Brachyury* is also involved in controlling cell fate decisions while acting synergistically  
442 with the other transcription factors (like *Bix4*) and genes (*WNT11*) in the posterior mesoderm  
443 (Showell, Binder, and Conlon 2004). However, the expression of *TBXT.1* and *TBXT.2* in late  
444 developing tadpole structures has not been reported so far.

445 As described below, the temporal and spatial expression patterns of *TBXT.1* and *TBXT.2*,  
446 make them good candidate genes for regulating ossification only in hypochordal tissues. To

447 study the potential role of *TBXT.1* and *TBXT.2* in hypochordal ossification further, we performed  
448 HCR in-situ hybridization to examine the temporal and spatial expression patterns. *TBXT.1*  
449 expression is exclusively concentrated along the ossifying hypochord at the onset of  
450 metamorphosis but is not evident in prometamorphic nor at the end of metamorphic climatic  
451 tadpoles (Fig. 4).

452 An ossifying hypochord is only normally present in anurans, however, interestingly,  
453 hypochord ossification between the caudal part of the vertebral column and notochord also  
454 appears as a congenital vertebral anomaly seen prenatally in humans, caused by a mutation in  
455 the T (*TBXT*) gene (Postma et al. 2014; Ghebranious et al. 2008). In humans with this  
456 abnormality, increased expression or duplications of the *TBXT* gene result in production of  
457 excess *Brachyury* (Zhu, Kwan, and Mackem 2016; Chen et al. 2020). It has been hypothesized  
458 that this excess *Brachyury* causes residual cells ventral to the notochord to grow and ossify in  
459 humans and sometimes results in sacral agenesis in newly born babies (commonly referred to  
460 as the “frog-like” syndrome). The observation of high levels of *TBXT/TBXT2* in ossifying  
461 hypochordal cells (which is ossified ventral to the notochord) and presence of two duplicated  
462 copies of the *TBXT* (*T* and *T2/TBXT* and *TBXT.2*) in anurans compared to normal humans and  
463 other vertebrates is thus tantalizing and needs further scrutiny. Previous studies have shown that  
464 *Brachyury* acts as a switch in posterior mesoderm specification during embryogenesis and is  
465 restricted to the anteroposterior axis (Cunliffe and Smith 1994, 1992). Here, during hypochordal  
466 ossification, the onset of metamorphosis could be triggering ectopic expression of *TBXT/TBXT.2*  
467 in hypochordal cells, which could potentially express posterior mesodermal genes and

468 subsequently activate down-stream targets of *TBXT/TBXT2*, which in turn initiates  
469 chondrification and ossification.

470

#### 471 **Transcriptomic comparisons between coccyx + hypochord and other ossifying elements**

472 Vertebrate ossification happens by two major processes: endochondral (cartilaginous  
473 precursors used as a template) and intramembranous (direct ossification of the condensed  
474 mesenchymal cells) (Breeland, Sinkler, and Menezes 2021). Even though coccyx and hypochord  
475 are derived from two different cell populations, they both undergo endochondral ossification  
476 (Senevirathne et al. 2020). During this process, mesenchymal cells condense (commit to form  
477 osteoprogenitors) and aggregate to form cartilaginous precursors during early development.  
478 Cartilaginous precursors expand and cells proliferate, next the extracellular matrix is  
479 synthesized, and finally, mineralization of the matrix occurs. These steps are similar to other  
480 bones in vertebrates, which undergo endochondral ossification as well (Mackie et al. 2008).  
481 However, to see if the transcriptomic profile during this process is conserved in the two bones  
482 that form the urostyle, we compared the spatial and temporal transcriptomic maps of the  
483 osteocytes (from published datasets of different skeletal tissues of different ages) with my  
484 current dataset.

485 Youlten et al. (Youlten et al. 2021) identified three clusters of gene ontology (GO)  
486 functions during osteocyte development: 1. “An early expression cluster” (expressed in  
487 osteoprogenitors/osteoblast-like cells); 2. “An early activation cluster” (expressed in early  
488 osteocytes); 3. “A maturation cluster” (expressed in mature osteocytes). We compared the



489 expression of the genes belonging to these GO functions with the coccygeal and hypochordal  
490 transcriptomics to see if the molecular underpinning of ossification is similar in the genes  
491 responsible for the formation of the urostyle as well.

492 *Early expression cluster.* —This included GO term functions “Extracellular matrix organization”,  
493 “Angiogenesis”, “Cartilage development”, and “Connective tissue development” (electronic  
494 supplementary material, figure S4). Out of the genes that are differentially expressed, there are  
495 some that are inactive before metamorphosis in the hypochord (e.g., *COL22A1*, *COL16A1*,  
496 *COL6A3*, *RUNX1*, *IHH*), but are highly expressed once the metamorphosis is initiated. High  
497 expression of these genes in the coccygeal cells even before the onset of metamorphosis  
498 corroborates our morphological studies, where we revealed that the post caudal vertebrae of the  
499 coccyx initiated mesenchymal cell aggregation early in development (1.5 months after  
500 embryogenesis) vs 2 months in hypochord. Apart from the differences in the temporal expression  
501 of genes within the “Early expression cluster”, a few genes involved in cartilage development are  
502 not present in the hypochord compared to the coccyx (e.g. *FOXL1*, *RUNX3*, *FOXD3*, *PMM2*,  
503 *EDNI*).

504 *Early activation cluster.* —This cluster includes the GO terms “Axon guidance”, “Axon  
505 development”, “Axogenesis”, “Regulation of axogenesis”, and “Neuron projection guidance”  
506 (Fig. 5). While the coccyx DEGs act in a similar way to the rest of the long bones in vertebrates  
507 within this cluster, hypochord shows a different pattern. Most of the genes (e.g., *NTRN*,  
508 *SLITRK3*, *POUF42*, *DCC*) that are discussed as essential regulators in guiding the axons in long  
509 bones are not expressed within the hypochord (Fig. 5).

510 *Maturation cluster*. —The GO term functions “Bone development”, “Skeletal system  
511 development”, “Regulation of ossification”, “Ossification”, “Osteoblast differentiation” are  
512 included in this cluster (supplementary material, figure S5). Maturation period in the hypochord  
513 happens once the metamorphosis is initiated and when the tadpole reaches the end of its  
514 metamorphic climax (supplementary material, figure S5). Within the hypochord, genes involved  
515 in ossification (e.g., *GPC3*, *TMEM19*, *IFITM5*, *COL11A1*, *PHOSPHO1*, *SOX8*) and osteoblast  
516 differentiation (e.g., *GLI1*, *FBN2*, *SATB2*) are highly expressed in tadpoles at the end of the  
517 metamorphic climatic and are inactive at prometamorphic stages. Comparatively, in the coccyx,  
518 since the ossification happens prior to the metamorphic climax, the majority of the genes are  
519 highly expressed even at the beginning of metamorphosis. A few genes (e.g., *TBX15*, *BARX2*,  
520 *SHH*, *AXIN2*) are not expressed in hypochord nor in the coccyx, compared to the other ossifying  
521 long bones in vertebrates.

522 This transcriptomic comparison led to three main findings: (1). Between the two tissue types, the  
523 coccyx’s DEGs share similarities with the other bones’ transcriptomics in vertebrates. (2).  
524 Hypochord undergoes its early activation period before metamorphosis, and a maturation period  
525 once metamorphosis is initiated. (3) Hypochordal DEGs lack an early activation period, which  
526 includes most of the axon developing genes.

527

### 528 **ATAC-seq and Urostyle-responsive gene regulation**

529 During anuran metamorphosis, the larval body form undergoes dramatic remodeling within 6-8  
530 days, and this is reflected in both morphological and gene expression patterns. Therefore, it can

531 be extrapolated that gene regulation changes over this same time period. To study the underlying  
532 changes in chromatin accessibility, we used an ATAC-seq approach using the same  
533 developmental stages and the same number of replicates as the RNA-seq work. The number of  
534 peaks varied between the three stages that we used: before metamorphosis (4563 peaks),  
535 beginning of metamorphosis (6805 peaks), and end of metamorphosis (6805 peaks). More than  
536 50% of peaks were distributed in distal intergenic regions. The rest of the peaks were distributed  
537 along intronic, exons, and promoter regions. When comparing the three time points, the most  
538 significant change of peak distribution observed was the percentage of peaks that fell on the exon  
539 regions (other than the 1<sup>st</sup> exon): before metamorphosis the percentage was lower (<1%) when  
540 compared with the number of peaks that were seen at the beginning and at the end of  
541 metamorphosis (7–10%) (Fig. 6B).

542         Next, we compared the ATAC-seq data with the RNA-seq data and observed that  
543 majority of the peaks are located close to the up-regulated genes in the hypochord and coccyx  
544 that were identified from the transcriptomic data. The genes *TBXT* and *TBXT.2*, which are up  
545 regulated in the hypochord, have peaks located within the intronic regions before and at the  
546 beginning of metamorphosis, and the peak is lost at the end of metamorphosis (Fig. 6D). Other  
547 genes expressed in hypochordal tissues like *MMP1* and *COL22A1* have peaks downstream of the  
548 genes and are seen only once the metamorphosis is initiated. Genes that were upregulated in the  
549 coccyx, e.g., *HOXD11*, *PVALB*, *DIO3*, and *ACTA2* have ATAC-seq peaks closer to each gene  
550 and were present throughout development (Fig. 6C–E). This could be because the coccygeal  
551 ossification occurs early in development (after 1.5 months) compared to the hypochord. These

552 results highlight urostyle-responsive regulatory regions during development and need further  
553 scrutinization using functional assays.

554

555

## DISCUSSION

556 The anuran urostyle, composed of a coccyx and a hypochord, reflects how novel structures  
557 facilitate evolution of new body plans. Our previous work presented a morphological analysis of  
558 the ontogeny of the anuran urostyle using immunohistochemistry, histology, bone and cartilage  
559 staining, and microCT scanning. Through this, we identified cells of interest and the  
560 developmental stages to target for this follow up study. To elucidate how this structural novelty  
561 arose and its genetic underpinnings, we used a spatial transcriptomic (RNA-seq) and an ATAC-  
562 seq approach.

563

### 564 **T-box genes and the hypochord**

565 The coccyx and hypochord have two sets of differentially expressed genes. Hypochordal genes  
566 are active at the onset of metamorphosis, whereas the coccygeal DEGs are highly expressed even  
567 before metamorphosis. This analysis revealed a large set of genes (Tables 3.1 and 3.2 and  
568 Appendices C, D) that are uniquely up regulated in the hypochord and have not been reported  
569 before. One of the most significant groups of genes that is upregulated in the hypochord are the  
570 T-box genes (*TBXT* and *TBXT.2*). T-box genes have a 180-bp DNA binding domain that is  
571 highly conserved. Orthologues of the gene *Brachyury*, one of the highly expressed T-box genes

572 in the hypochord, are present in all multicellular organisms (Chen et al. 2020). *Brachyury* is  
573 important in posterior mesoderm development (initially expressed in the developing mesoderm  
574 but later restricted to the tail bud and notochord) (Hotta et al. 2000). While early mesoderm  
575 differentiation patterning depends highly on *TBXT/TBXT.2*, a role for these genes in later  
576 developmental stages has not been previously reported or discussed. During metamorphosis, the  
577 tadpole body undergoes dramatic remodeling, including tail loss and development of new  
578 structures like the urostyle. The hypochord, thought to be of an endodermal or superficial  
579 mesoderm origin, undergoes ossification at the beginning of metamorphosis only in anurans. We  
580 hypothesize that presence of high levels of *TBXT/TBXT.2* causes the hypochordal cells to  
581 undergo ossification at the onset of metamorphosis. Such unusual ossification appears to also  
582 occur in response to a congenital vertebral column malformation (VCM) in humans that happens  
583 because of a *Brachyury* gene mutation in the intron 7 (Ghebranious et al. 2008) and in the highly  
584 conserved T-box sequence (Postma et al. 2014); these VCMs eventually lead to sacral agenesis  
585 (“frog-like”) syndrome in babies. Apart from these mutations, *TBXT/TBXT.2* genes also induce  
586 EMT in humans when over expressed in carcinoma cells (Henderson et al. 2005), and it has also  
587 been recorded that duplications of the *Brachyury* gene cause vertebral column chordomas  
588 (Vujovic et al. 2006; Henderson et al. 2005). Frogs have two paralogues of *Brachyury* genes,  
589 perhaps explaining the overexpression of *TBXT/TBXT.2* at the onset of metamorphosis, which  
590 could in turn allow the T genes to activate downstream targets that lead to chondrification and  
591 ossification. When *Brachyury* genes are highly expressed in human chordoma cells, matrix  
592 metalloproteinases (e.g., *MMP12*, *MMP13*, *MMP24*) (Wan et al. 2016) are also upregulated at

593 the same time (which is also seen in hypochordal cells). The extent to which the human and frog  
594 conditions are similar awaits functional tests.

595

### 596 **Coccyx and hypochord vs other vertebrate skeletal elements**

597 Coccyx and hypochord undergo endochondral ossification and show an array of genes that are  
598 similar to the genes expressed in other long bones that undergo endochondral ossification in  
599 vertebrates (e.g., mesenchymal-to-chondrocytes involved genes like *BMPs*, *SOX9*; chondrocytes-  
600 to-osteoblasts/osteocytes was seen in highly expressed genes like *RUNX2*, *Osterix*, *IHH*). Apart  
601 from these similarities, when comparing the already published osteocyte transcriptomics  
602 (Youlten et al. 2021), hypochord shows some considerable differences among the rest of the  
603 bones in vertebrates. Hypochordal cells express osteoprogenitor-specific genes before the  
604 metamorphic climax, and metamorphosis acts as a switch that activates osteogenesis (vs in  
605 coccyx osteogenesis is initiated prior to metamorphosis). Other than the temporal differences  
606 observed regarding ossification, the DEGs of the hypochord reveal that hypochordal cells lack  
607 the “early activation phase,” which includes regulators needed in “Axogenesis” and “Axon  
608 development” in ossifying bones (Fig. 5). Vertebrate bones are innervated by sensory and  
609 sympathetic nerves during skeleton development (Tomlinson et al. 2020), where the periosteum  
610 and bone marrow have the highest density of nerves whereas the mineralized matrix has very  
611 few (Mach et al. 2002; Castaneda-Corral et al. 2011; Tomlinson et al. 2020). During  
612 development, bone innervation and endochondral ossification happen simultaneously  
613 (Tomlinson et al. 2020), and it is hypothesized that axon guidance regulates formation of the

614 neuronal network, which is subsequently required for the osteocyte network formation (Youlten  
615 et al. 2021). It is surprising that the ossifying hypochord lacks the genes needed for axon  
616 development (Fig. 5), and our results raises the possibility that the hypochordal development  
617 maybe disconnected from the neuronal signals. Future work is needed scrutinizing the  
618 innervation patterns within the hypochord during its development to better understand this.

619 Our integrative approach, using morphological and molecular data sets (genes and gene  
620 regulation) on the development of the urostyle, scrutinizes the evolution of a novelty. This has  
621 been evolutionary favored for more than 200 million years and is seen in all extant anurans  
622 during their development. We propose that the underlying changes in the genetic network gave  
623 rise to the anuran urostyle, and it is an evolutionary novelty that has enabled successful  
624 inhabitation of several ecological niches. Future work targeting the candidate genes responsible  
625 for the development of the urostyle, together with functional assays, will shed light on the  
626 evolution of this structural enigma.

## 627 ACKNOWLEDGMENTS

628 We would like to thank Marko Horb, Nikko-Ideen Shaidaini, and Marcin Wlizla (National  
629 Xenopus Resource [NXR], Marine Biological Laboratory) for husbandry and providing *X.*  
630 *tropicalis* tadpoles; James Hanken, Victoria Prince and Shubin Lab members for their comments  
631 and helpful discussions on this work. This work was supported by University of Chicago  
632 Biological Sciences and the Brinson Foundation (to N.H.S.) and by O'Brien and Hasten  
633 Fellowship to G.S.

634

635

## **AUTHOR CONTRIBUTIONS**

636 G.S. and N.H.S conceptualized the project and designed research. G.S. Performed research and

637 analyzed data. G.S. wrote the paper with inputs from N.H.S.



638

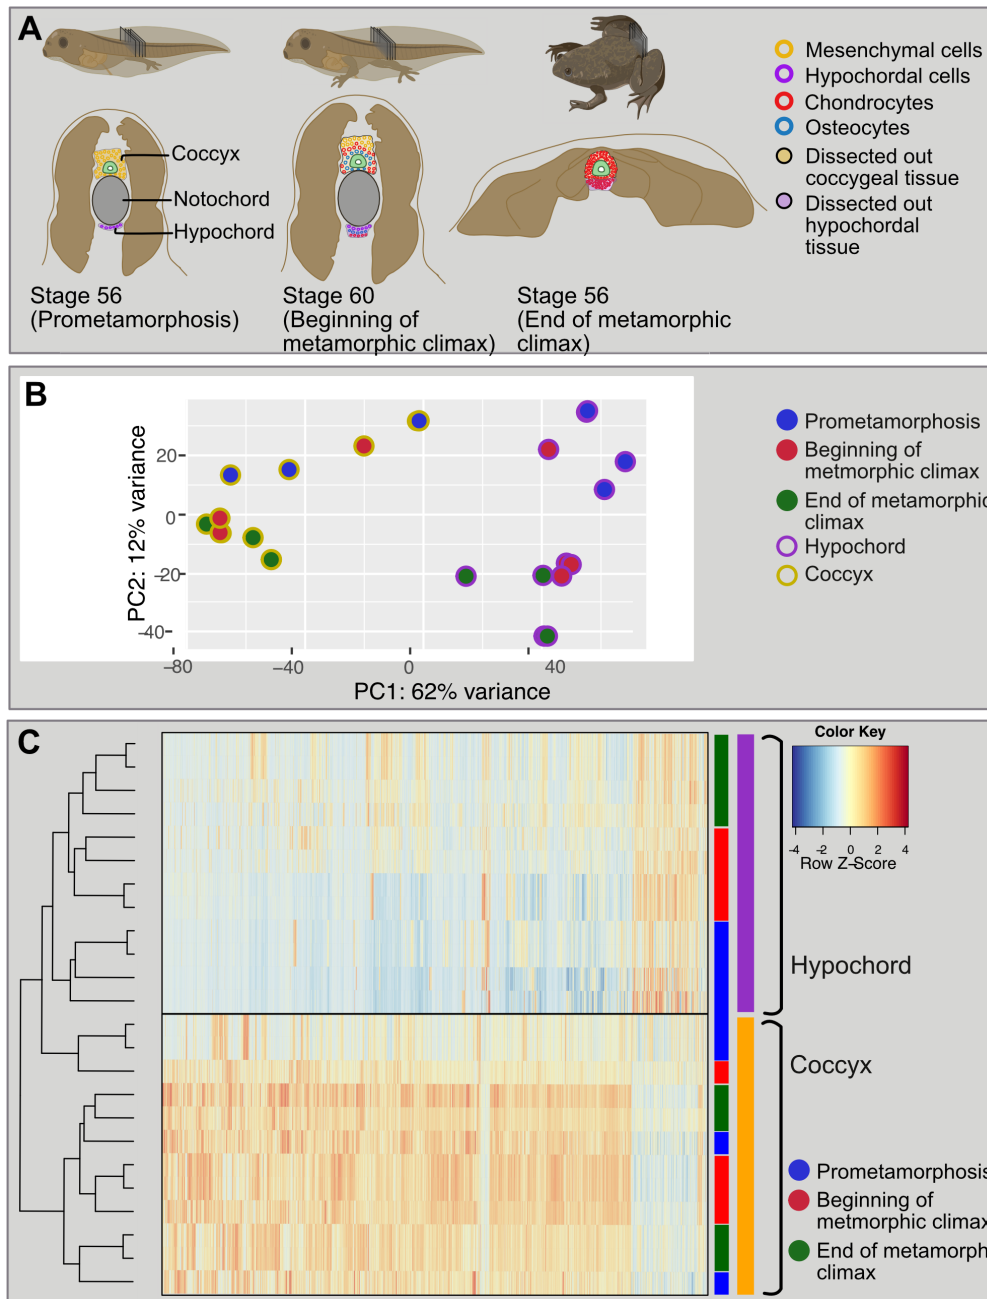

**Figure 1: Changes in transcriptomics during anuran urostyle development. A.**

The experimental setup and the developmental stages used for Laser-capture microdissections. Ten sections of cryosections (16 mm each) were taken from three developmental stages (stage 56: prometamorphosis; stage 61: beginning of the metamorphic climax; stage 65: end of metamorphosis) and the coccygeal and hypochordal tissues were dissected out.

**B.** Principal component analysis for the urostyle tissues (coccyx and hypochord) used for the transcriptomic assay (N=4 biological replicates per developmental stage). **B.** Principal component analysis of the log-normalized count data for all 24 samples. Each dot represents a tissue sample. **C.** Heatmap,

highlighting the differentially expressed genes, compared between three developmental stages and two tissue types. The heatmap highlights that the two tissue types possess two distinct sets of genes.

681

682 highlighting the differentially expressed genes, compared between three developmental stages and two tissue types.  
683 The heatmap highlights that the two tissue types possess two distinct sets of genes.

684

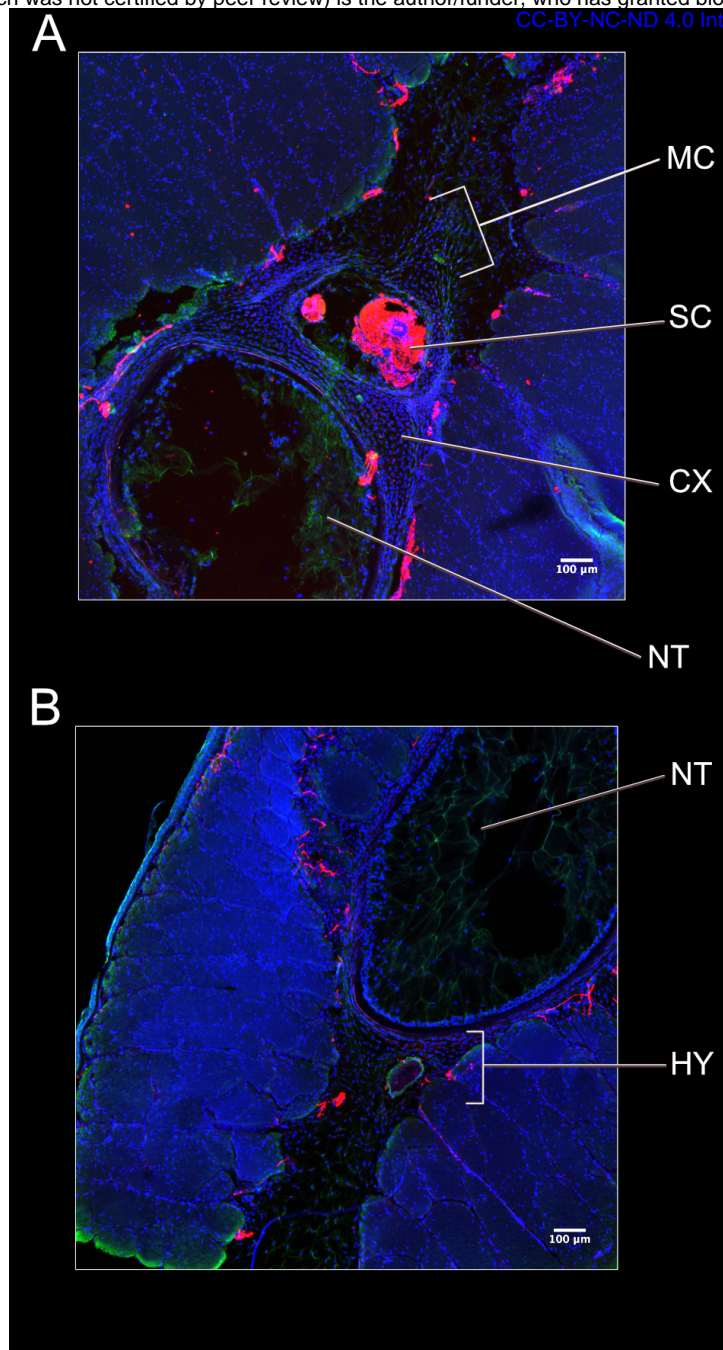

685

686 **Figure 2: Comparison of the hypochordal and coccygeal sections before metamorphosis (stage 57).** A. A  
687 transverse section across the coccyx, highlighting the aggregating mesenchymal cells around the spinal cord. B. A  
688 transverse section across the hypochord, highlighting the embryonic hypochordal cells ventral to the notochord and  
689 notochordal sheath. Nuclei stained in blue, using DAPI and neurons stained in red using acetylated tubulin.

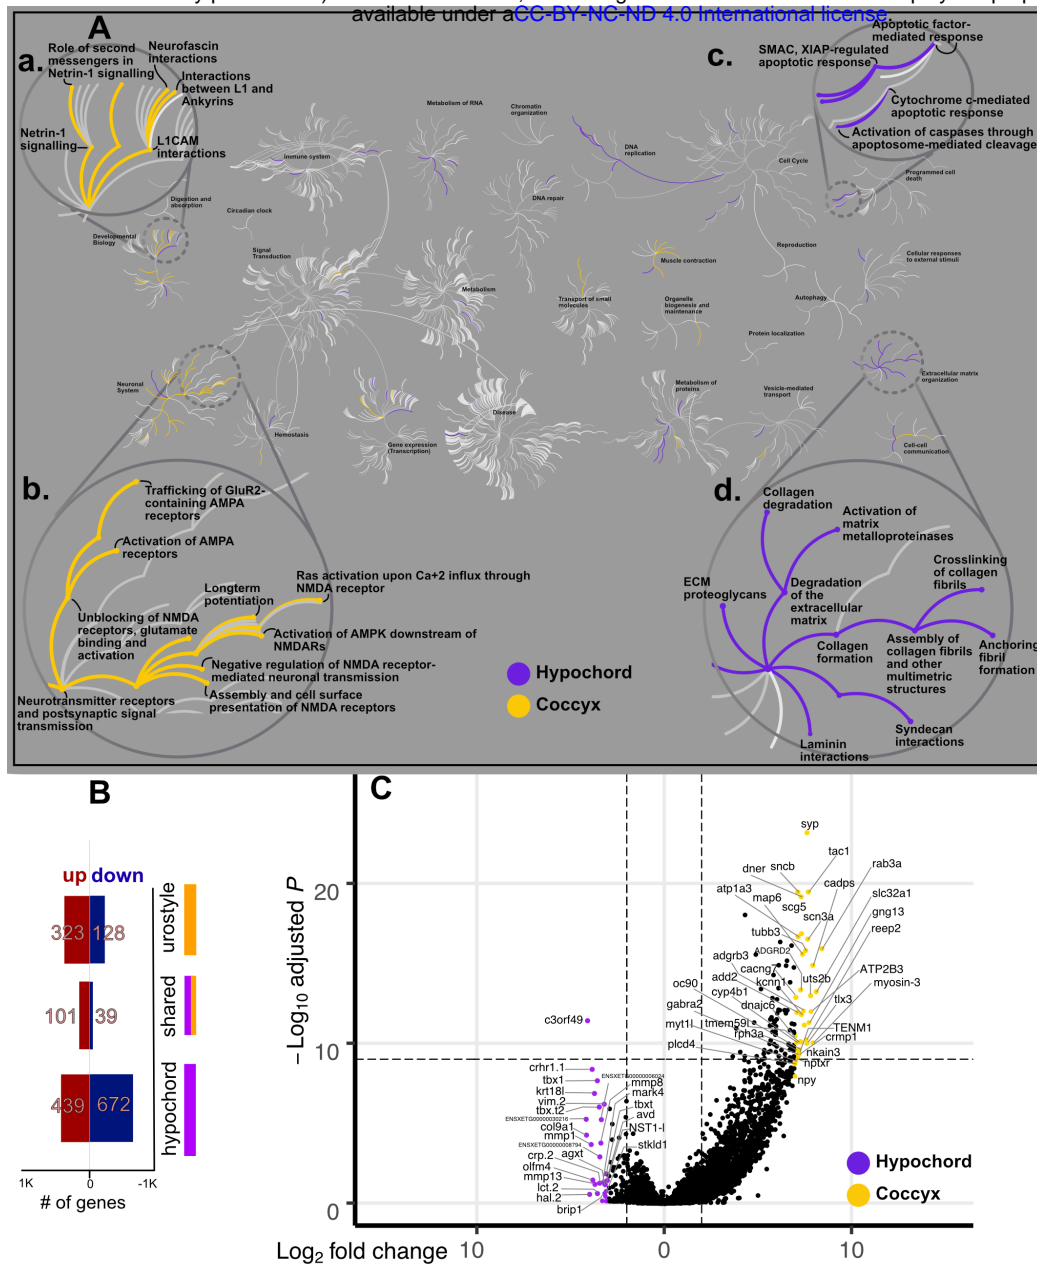

**Figure 3: Comparative transcriptomic analysis of the two tissue types: coccyx and hypochord.** A. A Reactome pathway analysis for up/down regulatory genes in coccyx vs hypochord; the central circles represent a top-level pathway, and the circles away from the center represents lower levels in each respective pathway. Zoomed-in sections of top-level pathways of Developmental Biology (Aa), Neuronal system (Ab), Programmed cell death (Ac), and Extracellular matrix organization (Ad) are shown. Overrepresented pathways ( $P < 0.05$ ) are colored in yellow (coccyx) and purple (hypochord). Pathways that are not significant are shown in light gray lines. B. Most hypochordal genes are involved in organizing the extracellular matrix, whereas the majority of coccygeal genes are involved in neuronal remodeling and modifications. B. The total number of urostyle-responsive genes ( $FDR < 0.01$ ) between hypochord and coccyx. C. Volcano plot showing differentially expressed genes across hypochord and coccyx during development ( $P < 0.05$ ,  $FDR < 0.01$ ).

692

693

694

695

696

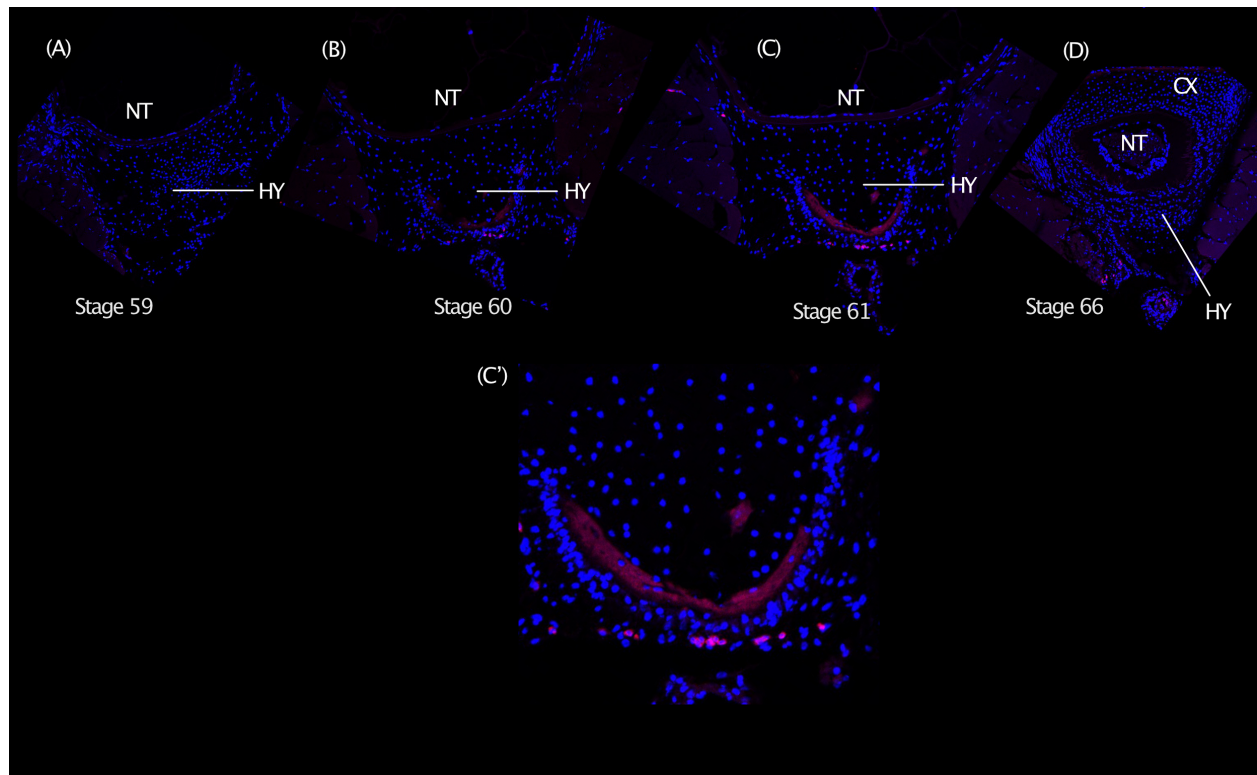

**Figure 4. TBXT HCR in-situ hybridization on transverse sections of the urostyle.** The periphery of the developing hypochord shows expression of TBXT (pink color), which is initiated once the hypochord starts to form and depletes when the hypochord fuses with the coccyx. Nuclei are stained using DAPI (blue). Abbreviations: CX, coccyx; HY, Hypochord; NT, notochord.

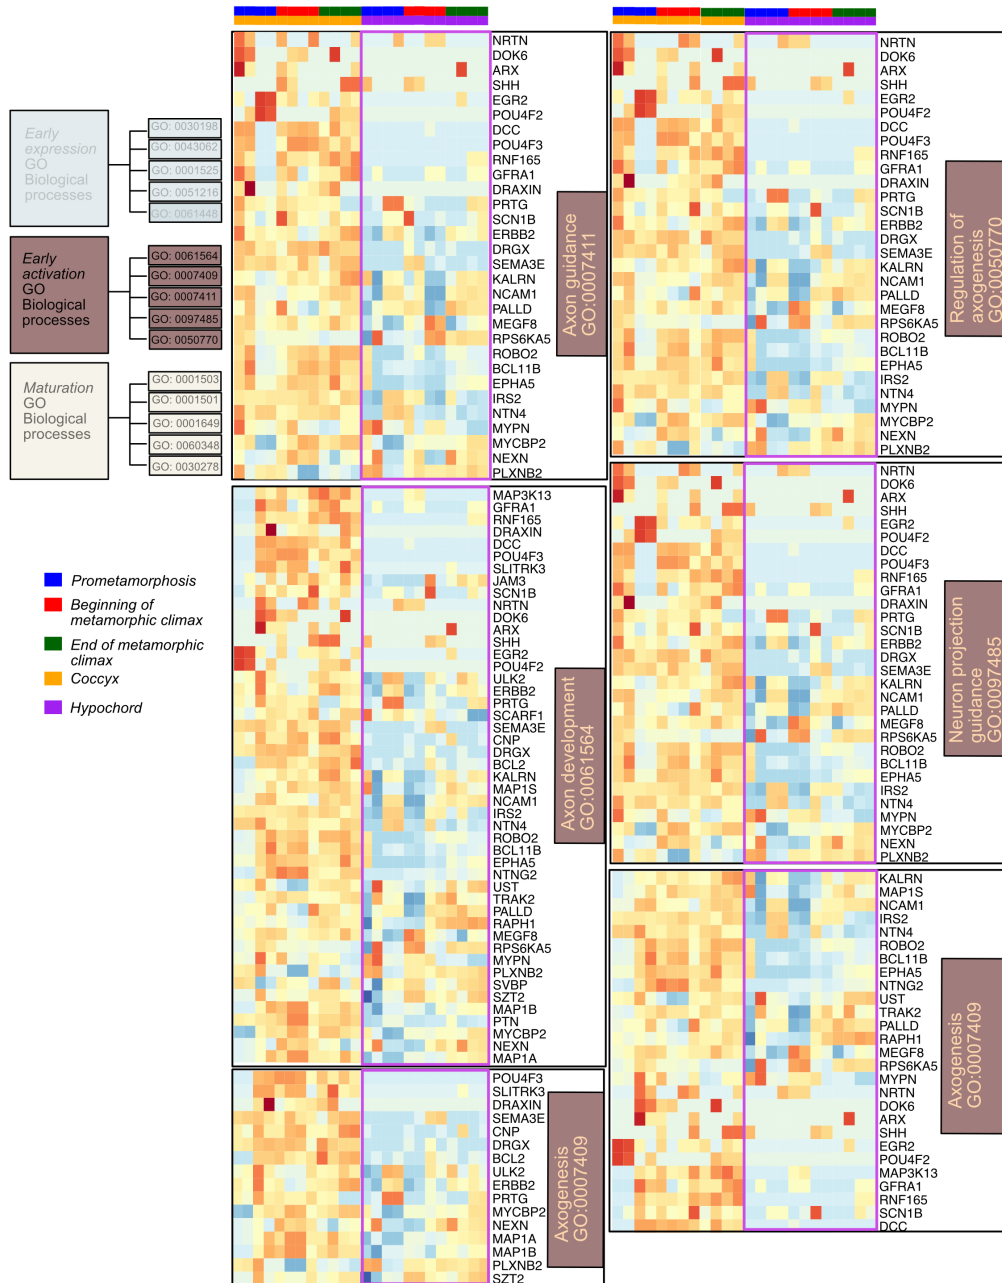

697 **Figure 5: Heatmaps showing differentially expressed genes involved in GO functions belonging to the “Early**  
 698 **activation cluster” of osteocyte differentiation.** Significant genes of the osteocyte transcriptome are divided into  
 699 three clusters (*Youlten et al. 2021*). This cluster includes the GO functions Axon guidance, Axon development,  
 700 Axogenesis, Regulation of axogenesis, and Neuron projection guidance. Genes of interest that are differentially  
 701 expressed between the coccyx and hypochord are highlighted in purple color.  
 702

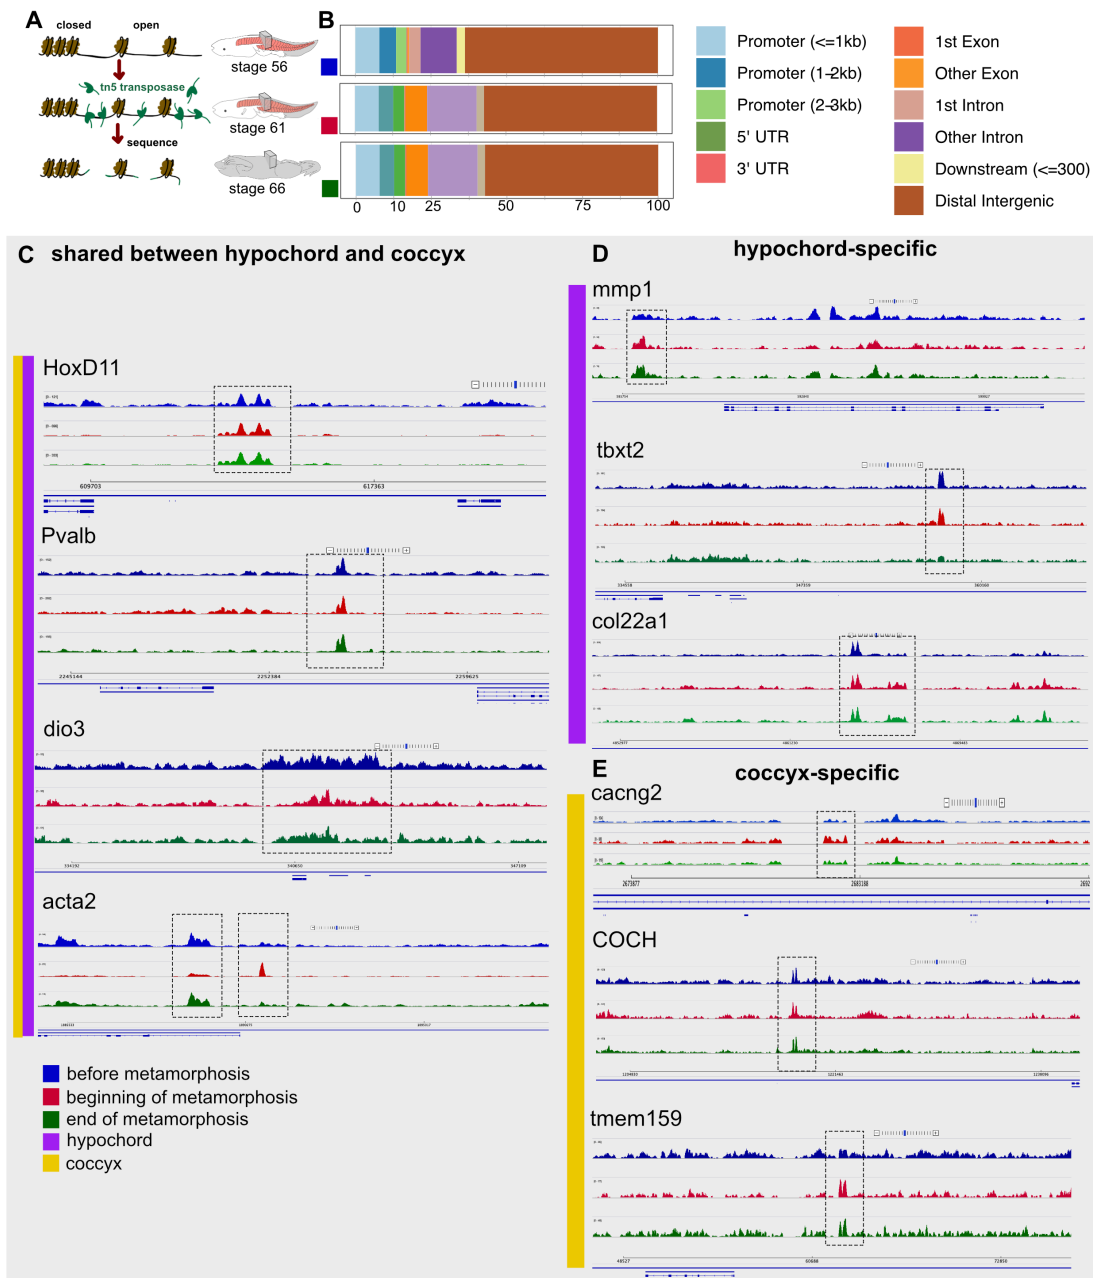

**Figure 6: Urostyle-responsive regulatory regions.** A. Schematic diagram showing the workflow for chromatin profiling experiment. B. Proportions of developing urostyle ATAC-seq peaks annotated to different genomic regions across development; majority of the peaks fall within the distal intergenic region and beginning (stage 61) and end of metamorphic climatic (stage 65) peaks differ from the prometamorphic (stage 56) ATAC-seq peaks with respect to peaks falling within the exon regions that are not the first exon. C–E. ATAC-seq urostyle profiles at stage 56 (blue), stage 61 (red), and stage 65 (green) at the loci of validated up-regulatory genes narrowed down from RNA-seq analyses.

704

### 3.5 – REFERENCES

705

- 706 Anders, S., P. T. Pyl, and W. Huber. 2015. 'HTSeq--a Python framework to work with high-  
707 throughput sequencing data', *Bioinformatics*, 31: 166-9.
- 708 Auxerre-Plantie, E., T. Nielsen, M. Grunert, O. Olejniczak, A. Perrot, C. Ozcelik, D. Harries, F.  
709 Matinmehr, C. Dos Remedios, C. Muhlfeld, T. Kraft, R. Bodmer, G. Vogler, and S. R.  
710 Sperling. 2020. 'Identification of MYOM2 as a candidate gene in hypertrophic  
711 cardiomyopathy and Tetralogy of Fallot, and its functional evaluation in the *Drosophila*  
712 heart', *Dis Model Mech*, 13.
- 713 Behr, R., C. Heneweer, C. Viebahn, H. W. Denker, and M. Thie. 2005. 'Epithelial-mesenchymal  
714 transition in colonies of rhesus monkey embryonic stem cells: a model for processes  
715 involved in gastrulation', *Stem Cells*, 23: 805-16.
- 716 Bianco, A. C., and R. R. da Conceicao. 2018. 'The Deiodinase Trio and Thyroid Hormone  
717 Signaling', *Methods Mol Biol*, 1801: 67-83.
- 718 Brachvogel, B., F. Zaucke, K. Dave, E. L. Norris, J. Stermann, M. Dayakli, M. Koch, J. J.  
719 Gorman, J. F. Bateman, and R. Wilson. 2013. 'Comparative proteomic analysis of normal  
720 and collagen IX null mouse cartilage reveals altered extracellular matrix composition and  
721 novel components of the collagen IX interactome', *J Biol Chem*, 288: 13481-92.
- 722 Branham, A. E., and J. C. List. 1979. 'Development of the Urostyle during Metamorphosis in 5  
723 Species of Anurans', *Journal of Morphology*, 159: 311-29.
- 724 Bray, N. L., H. Pimentel, P. Melsted, and L. Pachter. 2016. 'Near-optimal probabilistic RNA-seq  
725 quantification', *Nat Biotechnol*, 34: 525-7.
- 726 Breeland, G., M. A. Sinkler, and R. G. Menezes. 2021. 'Embryology, Bone Ossification.' in,  
727 *StatPearls* (Treasure Island (FL)).
- 728 Brown, D. D., and L. Cai. 2007. 'Amphibian metamorphosis', *Dev Biol*, 306: 20-33.
- 729 Brown, D. D., Z. Wang, A. Kanamori, B. Eliceiri, J. D. Furlow, and R. Schwartzman. 1995.  
730 'Amphibian metamorphosis: a complex program of gene expression changes controlled  
731 by the thyroid hormone', *Recent Prog Horm Res*, 50: 309-15.
- 732 Buenrostro, J. D., B. Wu, H. Y. Chang, and W. J. Greenleaf. 2015. 'ATAC-seq: A Method for  
733 Assaying Chromatin Accessibility Genome-Wide', *Curr Protoc Mol Biol*, 109: 21 29 1-  
734 21 29 9.
- 735 Callery, E. M., and R. P. Elinson. 2000. 'Thyroid hormone-dependent metamorphosis in a direct  
736 developing frog', *Proc Natl Acad Sci U S A*, 97: 2615-20.
- 737 Castaneda-Corral, G., J. M. Jimenez-Andrade, A. P. Bloom, R. N. Taylor, W. G. Mantyh, M. J.  
738 Kaczmarek, J. R. Ghilardi, and P. W. Mantyh. 2011. 'The majority of myelinated and  
739 unmyelinated sensory nerve fibers that innervate bone express the tropomyosin receptor  
740 kinase A', *Neuroscience*, 178: 196-207.
- 741 Chapman, D. L., A. Cooper-Morgan, Z. Harrelson, and V. E. Papaioannou. 2003. 'Critical role  
742 for Tbx6 in mesoderm specification in the mouse embryo', *Mech Dev*, 120: 837-47.

- 743 Chen, J., S. B. Suo, P. P. L. Tam, J. D. J. Han, G. D. Peng, and N. H. Jing. 2017. 'Spatial  
744 transcriptomic analysis of cryosectioned tissue samples with Geo-seq', *Nature Protocols*,  
745 12: 566-80.
- 746 Chen, M., Y. Wu, H. Zhang, S. Li, J. Zhou, and J. Shen. 2020. 'The Roles of Embryonic  
747 Transcription Factor BRACHYURY in Tumorigenesis and Progression', *Front Oncol*,  
748 10: 961.
- 749 Choi, J. H., S. S. Choi, E. S. Kim, M. P. Jedrychowski, Y. R. Yang, H. J. Jang, P. G. Suh, A. S.  
750 Banks, S. P. Gygi, and B. M. Spiegelman. 2014. 'Thrap3 docks on phosphoserine 273 of  
751 PPARgamma and controls diabetic gene programming', *Genes Dev*, 28: 2361-9.
- 752 Cleaver, O., and P. A. Krieg. 1998. 'VEGF mediates angioblast migration during development of  
753 the dorsal aorta in *Xenopus*', *Development*, 125: 3905-14.
- 754 Cleaver, O., D. W. Seufert, and P. A. Krieg. 2000. 'Endoderm patterning by the notochord:  
755 development of the hypochord in *Xenopus*', *Development*, 127: 869-79.
- 756 Cleaver, O., K. F. Tonissen, M. S. Saha, and P. A. Krieg. 1997. 'Neovascularization of the  
757 *Xenopus* embryo', *Dev Dyn*, 210: 66-77.
- 758 Corces, M. R., A. E. Trevino, E. G. Hamilton, P. G. Greenside, N. A. Sinnott-Armstrong, S.  
759 Vesuna, A. T. Satpathy, A. J. Rubin, K. S. Montine, B. Wu, A. Kathiria, S. W. Cho, M.  
760 R. Mumbach, A. C. Carter, M. Kasowski, L. A. Orloff, V. I. Risca, A. Kundaje, P. A.  
761 Khavari, T. J. Montine, W. J. Greenleaf, and H. Y. Chang. 2017. 'An improved ATAC-  
762 seq protocol reduces background and enables interrogation of frozen tissues', *Nat*  
763 *Methods*, 14: 959-62.
- 764 Cunliffe, V., and J. C. Smith. 1992. 'Ectopic mesoderm formation in *Xenopus* embryos caused  
765 by widespread expression of a Brachyury homologue', *Nature*, 358: 427-30.
- 766 ———. 1994. 'Specification of mesodermal pattern in *Xenopus laevis* by interactions between  
767 Brachyury, noggin and Xwnt-8', *EMBO J*, 13: 349-59.
- 768 Dong, H., Y. Zhang, J. Wang, D. S. Kim, H. Wu, B. Sjogren, W. Gao, L. Luttrell, and H. Wang.  
769 2017. 'Regulator of G protein signaling 2 is a key regulator of pancreatic beta-cell mass  
770 and function', *Cell Death Dis*, 8: e2821.
- 771 Fernando, R. I., M. Litzinger, P. Trono, D. H. Hamilton, J. Schlom, and C. Palena. 2010. 'The T-  
772 box transcription factor Brachyury promotes epithelial-mesenchymal transition in human  
773 tumor cells', *J Clin Invest*, 120: 533-44.
- 774 Galis, F., and J. A. Metz. 2007. 'Evolutionary novelties: the making and breaking of pleiotropic  
775 constraints', *Integr Comp Biol*, 47: 409-19.
- 776 Gan, Z., L. Ding, C. J. Burckhardt, J. Lowery, A. Zaritsky, K. Sitterley, A. Mota, N. Costigliola,  
777 C. G. Starker, D. F. Voytas, J. Tytell, R. D. Goldman, and G. Danuser. 2016. 'Vimentin  
778 Intermediate Filaments Template Microtubule Networks to Enhance Persistence in Cell  
779 Polarity and Directed Migration', *Cell Syst*, 3: 500-01.
- 780 Gaspar, J. M. 2018. 'NGmerge: merging paired-end reads via novel empirically-derived models  
781 of sequencing errors', *BMC Bioinformatics*, 19: 536.
- 782 Gentsch, G. E., T. Spruce, R. S. Monteiro, N. D. L. Owens, S. R. Martin, and J. C. Smith. 2018.  
783 'Innate Immune Response and Off-Target Mis-splicing Are Common Morpholino-  
784 Induced Side Effects in *Xenopus*', *Dev Cell*, 44: 597-610 e10.



- 785 Ghebraniou, N., R. D. Blank, C. L. Raggio, J. Staubli, E. McPherson, L. Ivacic, K. Rasmussen,  
786 F. S. Jacobsen, T. Faciszewski, J. K. Burmester, R. M. Pauli, O. Boachie-Adjei, I.  
787 Glurich, and P. F. Giampietro. 2008. 'A missense T (Brachyury) mutation contributes to  
788 vertebral malformations', *J Bone Miner Res*, 23: 1576-83.
- 789 Giacomazzi, G., B. Holvoet, S. Trenson, E. Caluwe, B. Kravic, H. Grosemans, A. Cortes-  
790 Calabuig, C. M. Deroose, D. Huylebroeck, S. Hashemolhosseini, S. Janssens, E.  
791 McNally, M. Quattrocelli, and M. Sampaolesi. 2017. 'MicroRNAs promote skeletal  
792 muscle differentiation of mesodermal iPSC-derived progenitors', *Nat Commun*, 8: 1249.
- 793 Gould, R. M., T. Oakley, J. V. Goldstone, J. C. Dugas, S. T. Brady, and A. Gow. 2008. 'Myelin  
794 sheaths are formed with proteins that originated in vertebrate lineages', *Neuron Glia Biol*,  
795 4: 137-52.
- 796 Handrigan, G. R., and R. J. Wassersug. 2007. 'The anuran Bauplan: a review of the adaptive,  
797 developmental, and genetic underpinnings of frog and tadpole morphology', *Biological*  
798 *Reviews*, 82: 1-25.
- 799 Hattori, T., C. Muller, S. Gebhard, E. Bauer, F. Pausch, B. Schlund, M. R. Bosl, A. Hess, C.  
800 Surmann-Schmitt, H. von der Mark, B. de Crombrughe, and K. von der Mark. 2010.  
801 'SOX9 is a major negative regulator of cartilage vascularization, bone marrow formation  
802 and endochondral ossification', *Development*, 137: 901-11.
- 803 Hayata, T., A. Eisaki, H. Kuroda, and M. Asashima. 1999. 'Expression of Brachyury-like T-box  
804 transcription factor, Xbra3 in Xenopus embryo', *Dev Genes Evol*, 209: 560-3.
- 805 Henderson, S. R., D. Guiliano, N. Presneau, S. McLean, R. Frow, S. Vujovic, J. Anderson, N.  
806 Sebire, J. Whelan, N. Athanasou, A. M. Flanagan, and C. Boshoff. 2005. 'A molecular  
807 map of mesenchymal tumors', *Genome Biol*, 6: R76.
- 808 Hesse, L., G. A. Stordalen, C. Wenglen, C. Petzold, E. Tanner, S. H. Brorson, E. S. Baekkevold,  
809 P. Onnerfjord, F. P. Reinholt, and D. Heinegard. 2014. 'The skeletal phenotype of  
810 chondroadherin deficient mice', *PLoS One*, 8: e63080.
- 811 Horowitz, M. 2003. 'Matrix proteins versus cytokines in the regulation of osteoblast function and  
812 bone formation', *Calcified Tissue International*, 72: 5-7.
- 813 Hotta, K., H. Takahashi, T. Asakura, B. Saitoh, N. Takatori, Y. Satou, and N. Satoh. 2000.  
814 'Characterization of Brachyury-downstream notochord genes in the *Ciona intestinalis*  
815 embryo', *Dev Biol*, 224: 69-80.
- 816 Kanamori, A., and D. D. Brown. 1996. 'The analysis of complex developmental programmes:  
817 amphibian metamorphosis', *Genes Cells*, 1: 429-35.
- 818 Karsenty, G. 2008. 'Transcriptional control of skeletogenesis', *Annual Review of Genomics and*  
819 *Human Genetics*, 9: 183-96.
- 820 Kovalenko, E. E., and E. V. Anisimova. 1987. 'The Structural and Developmental Peculiarities in  
821 the Sacral-Urostyle Area of Anura', *Zoologicheskyy Zhurnal*, 66: 557-+.
- 822 Kovalenko, E. E., and I. G. Danilov. 2006. 'Diversity of the sacral-urostyle region in the family  
823 Bufonidae (Amphibia, Anura). 1. Actual diversity of sacrum in Bufonidae',  
824 *Zoologicheskyy Zhurnal*, 85: 500-16.
- 825 Langmead, B., and S. L. Salzberg. 2012. 'Fast gapped-read alignment with Bowtie 2', *Nat*  
826 *Methods*, 9: 357-9.

- 827 Lofberg, J., and A. Collazo. 1997. 'Hypochord, an enigmatic embryonic structure: study of the  
828 axolotl embryo', *Journal of Morphology*, 232: 57-66.
- 829 Love, M. I., W. Huber, and S. Anders. 2014. 'Moderated estimation of fold change and  
830 dispersion for RNA-seq data with DESeq2', *Genome Biol*, 15: 550.
- 831 Mach, D. B., S. D. Rogers, M. C. Sabino, N. M. Luger, M. J. Schwei, J. D. Pomonis, C. P.  
832 Keyser, D. R. Clohisy, D. J. Adams, P. O'Leary, and P. W. Mantyh. 2002. 'Origins of  
833 skeletal pain: sensory and sympathetic innervation of the mouse femur', *Neuroscience*,  
834 113: 155-66.
- 835 Mackie, E. J., Y. A. Ahmed, L. Tatarczuch, K. S. Chen, and M. Mirams. 2008. 'Endochondral  
836 ossification: how cartilage is converted into bone in the developing skeleton', *Int J*  
837 *Biochem Cell Biol*, 40: 46-62.
- 838 Magrini, E., A. Mantovani, and C. Garlanda. 2016. 'The Dual Complexity of PTX3 in Health and  
839 Disease: A Balancing Act?', *Trends Mol Med*, 22: 497-510.
- 840 Messenger, N. J., C. Kabitschke, R. Andrews, D. Grimmer, R. Nunez Miguel, T. L. Blundell, J.  
841 C. Smith, and F. C. Wardle. 2005. 'Functional specificity of the Xenopus T-domain  
842 protein Brachyury is conferred by its ability to interact with Smad1', *Dev Cell*, 8: 599-  
843 610.
- 844 Mills, M., N. Yang, R. Weinberger, D. L. Vander Woude, A. H. Beggs, S. Eastal, and K. North.  
845 2001. 'Differential expression of the actin-binding proteins, alpha-actinin-2 and -3, in  
846 different species: implications for the evolution of functional redundancy', *Hum Mol*  
847 *Genet*, 10: 1335-46.
- 848 Ordway, G. A., A. Szebeni, M. M. Duffourc, S. Dessus-Babus, and K. Szebeni. 2009. 'Gene  
849 expression analyses of neurons, astrocytes, and oligodendrocytes isolated by laser capture  
850 microdissection from human brain: detrimental effects of laboratory humidity', *J*  
851 *Neurosci Res*, 87: 2430-8.
- 852 Paraiso, K. D., I. L. Blitz, J. J. Zhou, and K. W. Y. Cho. 2019. 'Morpholinos Do Not Elicit an  
853 Innate Immune Response during Early Xenopus Embryogenesis', *Dev Cell*, 49: 643-50  
854 e3.
- 855 Pickering, C., and J. Kiely. 2017. 'ACTN3: More than Just a Gene for Speed', *Front Physiol*, 8:  
856 1080.
- 857 Postma, A. V., M. Alders, M. Sylva, C. M. Bilardo, E. Pajkrt, R. R. van Rijn, S. Schulte-Merker,  
858 S. Bulk, S. Stefanovic, A. Ilgun, P. Barnett, M. M. Mannens, A. F. Moorman, R. J.  
859 Oostra, and M. C. van Maarle. 2014. 'Mutations in the T (brachyury) gene cause a novel  
860 syndrome consisting of sacral agenesis, abnormal ossification of the vertebral bodies and  
861 a persistent notochordal canal', *J Med Genet*, 51: 90-7.
- 862 Qin, X., Q. Jiang, K. Nagano, T. Moriishi, T. Miyazaki, H. Komori, K. Ito, K. V. Mark, C.  
863 Sakane, H. Kaneko, and T. Komori. 2020. 'Runx2 is essential for the transdifferentiation  
864 of chondrocytes into osteoblasts', *PLoS Genet*, 16: e1009169.
- 865 Radisky, D. C. 2005. 'Epithelial-mesenchymal transition', *J Cell Sci*, 118: 4325-6.
- 866 Rahman, M. M., I. S. Kim, D. Ahn, H. J. Tae, and B. Y. Park. 2020. 'PR domaincontaining  
867 protein 12 (prdm12) is a downstream target of the transcription factor zic1 during cellular

- 868 differentiation in the central nervous system: PR domain containing protein is the right  
869 form', *Int J Dev Neurosci*, 80: 528-37.
- 870 Reul, J. M., and F. Holsboer. 2002. 'On the role of corticotropin-releasing hormone receptors in  
871 anxiety and depression', *Dialogues Clin Neurosci*, 4: 31-46.
- 872 Sanchez, R. S., and S. S. Sanchez. 2013. 'Characterization of pax1, pax9, and uncx sclerotomal  
873 genes during *Xenopus laevis* embryogenesis', *Dev Dyn*, 242: 572-9.
- 874 ———. 2015. 'Paraxis is required for somite morphogenesis and differentiation in *Xenopus*  
875 *laevis*', *Dev Dyn*, 244: 973-87.
- 876 Schiaffino, S., A. C. Rossi, V. Smerdu, L. A. Leinwand, and C. Reggiani. 2015. 'Developmental  
877 myosins: expression patterns and functional significance', *Skelet Muscle*, 5: 22.
- 878 Schulte-Merker, S., and J. C. Smith. 1995. 'Mesoderm formation in response to Brachyury  
879 requires FGF signalling', *Curr Biol*, 5: 62-7.
- 880 Senevirathne, G., S. Baumgart, N. Shubin, J. Hanken, and N. H. Shubin. 2020. 'Ontogeny of the  
881 anuran urostyle and the developmental context of evolutionary novelty', *Proceedings of*  
882 *the National Academy of Sciences of the United States of America*, 117: 3034-44.
- 883 Shen, X. K., Y. Hu, G. Q. Xu, W. Z. Chen, K. Xu, Q. C. Ran, P. P. Ma, Y. R. Zhang, J. H. Li,  
884 and K. Y. Cai. 2014. 'Regulation of the Biological Functions of Osteoblasts and Bone  
885 Formation by Zn-Incorporated Coating on Microrough Titanium', *Acs Applied Materials*  
886 *& Interfaces*, 6: 16426-40.
- 887 Shook, D. R., C. Majer, and R. Keller. 2004. 'Pattern and morphogenesis of presumptive  
888 superficial mesoderm in two closely related species, *Xenopus laevis* and *Xenopus*  
889 *tropicalis*', *Dev Biol*, 270: 163-85.
- 890 Showell, C., O. Binder, and F. L. Conlon. 2004. 'T-box genes in early embryogenesis', *Dev Dyn*,  
891 229: 201-18.
- 892 Shubin, N. H., and F. A. Jenkins. 1995. 'An Early Jurassic Jumping Frog', *Nature*, 377: 49-52.
- 893 Shubin, N., C. Tabin, and S. Carroll. 2009. 'Deep homology and the origins of evolutionary  
894 novelty', *Nature*, 457: 818-23.
- 895 Smith, J. C., B. M. Price, J. B. Green, D. Weigel, and B. G. Herrmann. 1991. 'Expression of a  
896 *Xenopus* homolog of Brachyury (T) is an immediate-early response to mesoderm  
897 induction', *Cell*, 67: 79-87.
- 898 Snell, C. A. 2015. 'Identifying Ranid urostyle, ilial and anomalous bones from a 15th century  
899 London well', *Herpetological Journal*, 25: 245-55.
- 900 Sodek, J., and M. D. McKee. 2000. 'Molecular and cellular biology of alveolar bone',  
901 *Periodontology 2000*, 24: 99-126.
- 902 Stein, G. S., J. B. Lian, J. L. Stein, A. J. van Wijnen, M. Montecino, J. Pratap, J. Choi, S. K.  
903 Zaidi, A. Javed, S. Gutierrez, K. Harrington, J. L. Shen, and D. Young. 2003.  
904 'Intranuclear organization of RUNX transcriptional regulatory machinery in biological  
905 control of skeletogenesis and cancer', *Blood Cells Molecules and Diseases*, 30: 170-76.
- 906 Strauss, B., A. Harrison, P. A. Coelho, K. Yata, M. Zernicka-Goetz, and J. Pines. 2018. 'Cyclin  
907 B1 is essential for mitosis in mouse embryos, and its nuclear export sets the time for  
908 mitosis', *J Cell Biol*, 217: 179-93.

- 909 Tarazona, O. A., L. A. Slota, D. H. Lopez, G. Zhang, and M. J. Cohn. 2016. 'The genetic  
910 program for cartilage development has deep homology within Bilateria', *Nature*, 533: 86-  
911 9.
- 912 Tigan, A. S., F. Bellutti, K. Kollmann, G. Tebb, and V. Sexl. 2016. 'CDK6-a review of the past  
913 and a glimpse into the future: from cell-cycle control to transcriptional regulation',  
914 *Oncogene*, 35: 3083-91.
- 915 Tomlinson, R. E., B. A. Christiansen, A. A. Giannone, and D. C. Genetos. 2020. 'The Role of  
916 Nerves in Skeletal Development, Adaptation, and Aging', *Front Endocrinol (Lausanne)*,  
917 11: 646.
- 918 Tschopp, P., and C. J. Tabin. 2017. 'Deep homology in the age of next-generation sequencing',  
919 *Philos Trans R Soc Lond B Biol Sci*, 372.
- 920 Uittenbogaard, M., K. K. Baxter, and A. Chiaramello. 2010. 'NeuroD6 genomic signature  
921 bridging neuronal differentiation to survival via the molecular chaperone network', *J*  
922 *Neurosci Res*, 88: 33-54.
- 923 Velez-delValle, C., M. Marsch-Moreno, F. Castro-Munozledo, I. J. Galvan-Mendoza, and W.  
924 Kuri-Harcuch. 2016. 'Epithelial cell migration requires the interaction between the  
925 vimentin and keratin intermediate filaments', *Sci Rep*, 6: 24389.
- 926 Vujovic, S., S. Henderson, N. Presneau, E. Odell, T. S. Jacques, R. Tirabosco, C. Boshoff, and  
927 A. M. Flanagan. 2006. 'Brachyury, a crucial regulator of notochordal development, is a  
928 novel biomarker for chordomas', *J Pathol*, 209: 157-65.
- 929 Wagner, G. P. 2015. 'Evolutionary innovations and novelties: Let us get down to business!',  
930 *Zoologischer Anzeiger*, 256: 75-81.
- 931 Wan, Z., D. Jiang, S. Chen, J. Jiao, L. Ji, A. S. Shah, H. Wei, X. Yang, X. Li, Y. Wang, and J.  
932 Xiao. 2016. 'T-box transcription factor brachyury promotes tumor cell invasion and  
933 metastasis in non-small cell lung cancer via upregulation of matrix metalloproteinase 12',  
934 *Oncol Rep*, 36: 306-14.
- 935 Wang, S., L. Liu, J. Liu, W. Zhu, Y. Tanizaki, L. Fu, L. Bao, Y. B. Shi, and J. Jiang. 2019. 'Gene  
936 Expression Program Underlying Tail Resorption During Thyroid Hormone-Dependent  
937 Metamorphosis of the Ornamented Pygmy Frog *Microhyla fissipes*', *Front Endocrinol*  
938 *(Lausanne)*, 10: 11.
- 939 Widmer, C., J. M. Gebauer, E. Brunstein, S. Rosenbaum, F. Zaucke, C. Drogemuller, T. Leeb,  
940 and U. Baumann. 2012. 'Molecular basis for the action of the collagen-specific chaperone  
941 Hsp47/SERPINH1 and its structure-specific client recognition', *Proc Natl Acad Sci U S*  
942 *A*, 109: 13243-7.
- 943 Yamaguchi, T., S. Kawakami, M. Hatamoto, H. Imachi, M. Takahashi, N. Araki, T. Yamaguchi,  
944 and K. Kubota. 2015. 'In situ DNA-hybridization chain reaction (HCR): a facilitated in  
945 situ HCR system for the detection of environmental microorganisms', *Environ Microbiol*,  
946 17: 2532-41.
- 947 Yaoita, Y., and D. D. Brown. 1990. 'A correlation of thyroid hormone receptor gene expression  
948 with amphibian metamorphosis', *Genes Dev*, 4: 1917-24.

- 949 Yasuoka, Y., C. Shinzato, and N. Satoh. 2016. 'The Mesoderm-Forming Gene brachyury  
950 Regulates Ectoderm-Endoderm Demarcation in the Coral *Acropora digitifera*', *Curr Biol*,  
951 26: 2885-92.
- 952 Youlten, Scott E., John P. Kemp, John G. Logan, Elena J. Ghirardello, Claudio M. Sergio,  
953 Michael R. G. Dack, Siobhan E. Guilfoyle, Victoria D. Leitch, Natalie C. Butterfield,  
954 Davide Komla-Ebri, Ryan C. Chai, Alexander P. Corr, James T. Smith, Sindhu T.  
955 Mohanty, John A. Morris, Michelle M. McDonald, Julian M. W. Quinn, Amelia R.  
956 McGlade, Nenad Bartonicek, Matt Jansson, Konstantinos Hatzikotoulas, Melita D.  
957 Irving, Ana Beleza-Meireles, Fernando Rivadeneira, Emma Duncan, J. Brent Richards,  
958 David J. Adams, Christopher J. Lelliott, Robert Brink, Tri Giang Phan, John A. Eisman,  
959 David M. Evans, Eleftheria Zeggini, Paul A. Baldock, J. H. Duncan Bassett, Graham R.  
960 Williams, and Peter I. Croucher. 2021. 'Osteocyte transcriptome mapping identifies a  
961 molecular landscape controlling skeletal homeostasis and susceptibility to skeletal  
962 disease', *Nature Communications*, 12: 2444.
- 963 Youlten, Scott E., John P. Kemp, John G. Logan, Elena J. Ghirardello, Claudio M. Sergio,  
964 Michael R. G. Dack, Siobhan E. Guilfoyle, Victoria D. Leitch, Natalie C. Butterfield,  
965 Davide Komla-Ebri, Ryan C. Chai, Alexander P. Corr, James T. Smith, John A. Morris,  
966 Michelle M. McDonald, Julian M. W. Quinn, Amelia R. McGlade, Nenad Bartonicek,  
967 Matt Jansson, Konstantinos Hatzikotoulas, Melita D. Irving, Ana Beleza-Meireles,  
968 Fernando Rivadeneira, Emma Duncan, J. Brent Richards, David J. Adams, Christopher J.  
969 Lelliott, Robert Brink, Tri Giang Phan, John A. Eisman, David M. Evans, Eleftheria  
970 Zeggini, Paul A. Baldock, J. H. Duncan Bassett, Graham R. Williams, and Peter I.  
971 Croucher. 2020. 'Osteocyte Transcriptome Mapping Identifies a Molecular Landscape  
972 Controlling Skeletal Homeostasis and Susceptibility to Skeletal Disease', *bioRxiv*:  
973 2020.04.20.051409.
- 974 Zhang, Y., T. Liu, C. A. Meyer, J. Eeckhoute, D. S. Johnson, B. E. Bernstein, C. Nusbaum, R.  
975 M. Myers, M. Brown, W. Li, and X. S. Liu. 2008. 'Model-based analysis of ChIP-Seq  
976 (MACS)', *Genome Biol*, 9: R137.
- 977 Zhao, L., L. Liu, S. Wang, H. Wang, and J. Jiang. 2016. 'Transcriptome profiles of  
978 metamorphosis in the ornamented pygmy frog *Microhyla fissipes* clarify the functions of  
979 thyroid hormone receptors in metamorphosis', *Sci Rep*, 6: 27310.
- 980 Zhu, J., K. M. Kwan, and S. Mackem. 2016. 'Putative oncogene Brachyury (T) is essential to  
981 specify cell fate but dispensable for notochord progenitor proliferation and EMT', *Proc*  
982 *Natl Acad Sci U S A*, 113: 3820-5.
- 983 Zhu, Q., L. Song, G. Peng, N. Sun, J. Chen, T. Zhang, N. Sheng, W. Tang, C. Qian, Y. Qiao, K.  
984 Tang, J. D. Han, J. Li, and N. Jing. 2014. 'The transcription factor Pou3f1 promotes  
985 neural fate commitment via activation of neural lineage genes and inhibition of external  
986 signaling pathways', *Elife*, 3.

987

988

989 **Supplementary Material**  
 990

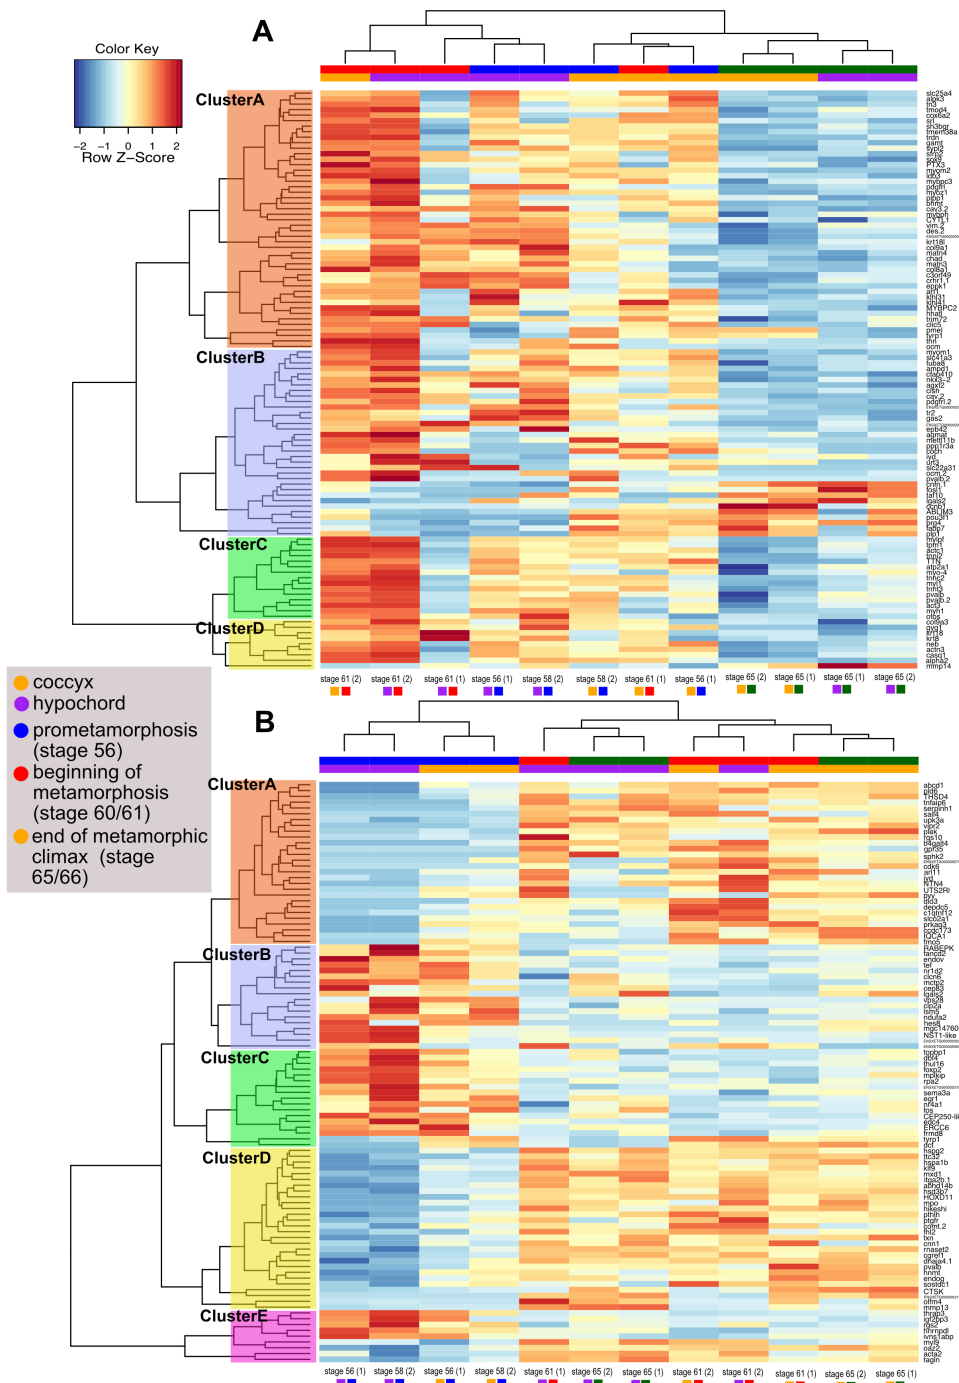

**Figure S1: Differentially expressed genes across different time points during urostyle development. A.** Heatmap showing before and beginning of metamorphosis vs end of metamorphosis, indicating that there is a set of genes (eg., *PTX3*, *SOX9*, *KRT18*) that switch off at the end of metamorphosis in both tissue types. B. Heatmap comparing before and beginning of metamorphosis, highlighting a set of genes (eg., *DIO3*, *HOXD11*, *PVALB*) that switch on during urostyle development. Purple: coccyx; Yellow: hypochord; Blue: before metamorphosis; Red: beginning of metamorphosis; Green: end of Metamorphosis

1030  
1031

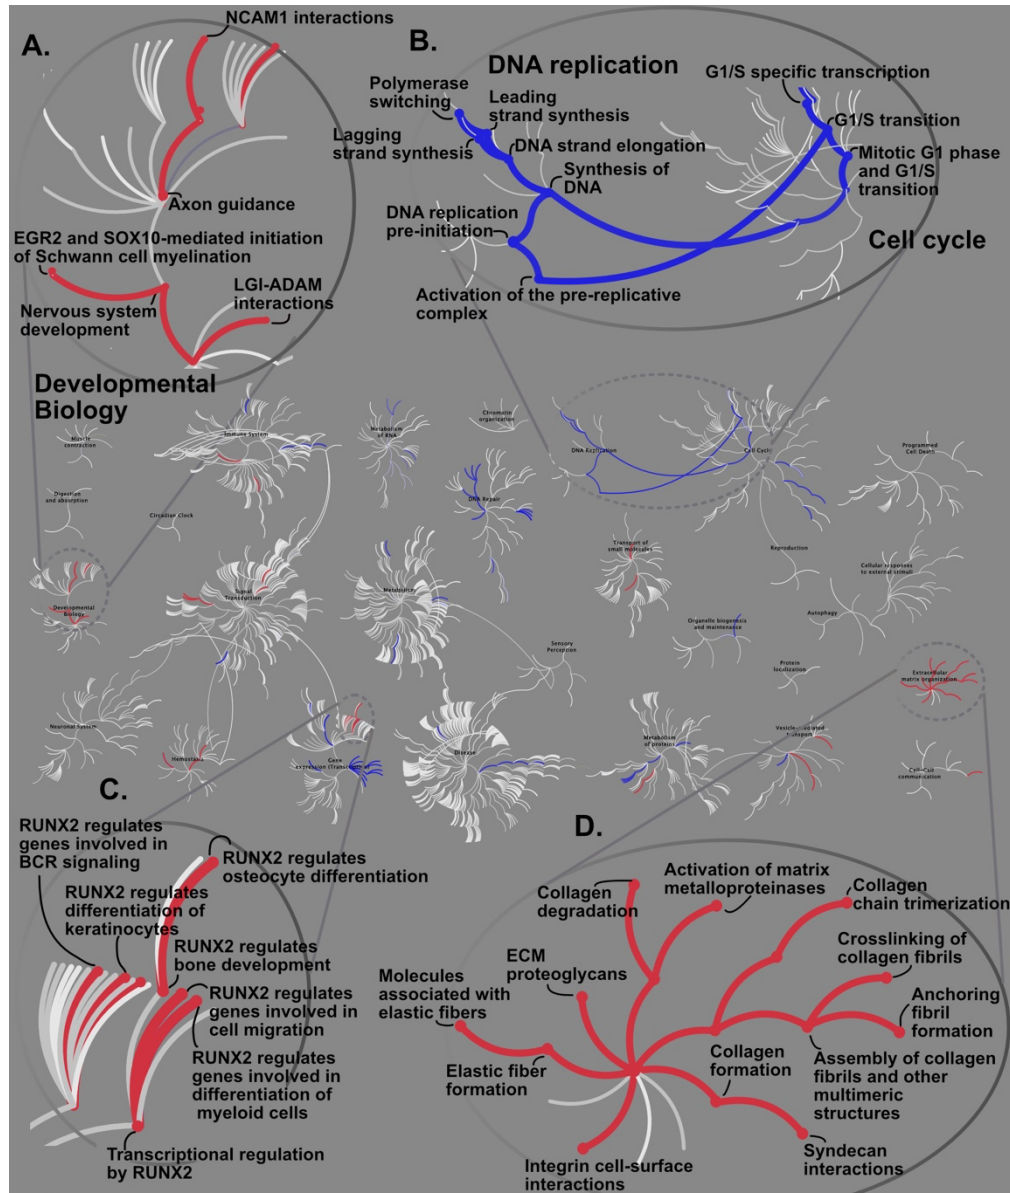

**Figure S2: Reactome pathway analysis for up/down regulatory genes in two different time points: before metamorphosis (blue) and beginning of metamorphosis (red).** The central circles represent a top-level pathway, and the circles away from the center represents lower levels in each respective pathway. Zoomed-in sections of top-level pathways of Developmental Biology (A), DNA replication and Cell cycle (B), Gene expression (C), and Extracellular matrix organization (D) are shown. Overrepresented pathways ( $P < 0.05$ ) are colored in blue (prometamorphosis) and red (beginning of metamorphosis). Pathways that are not significant are shown in light gray lines.

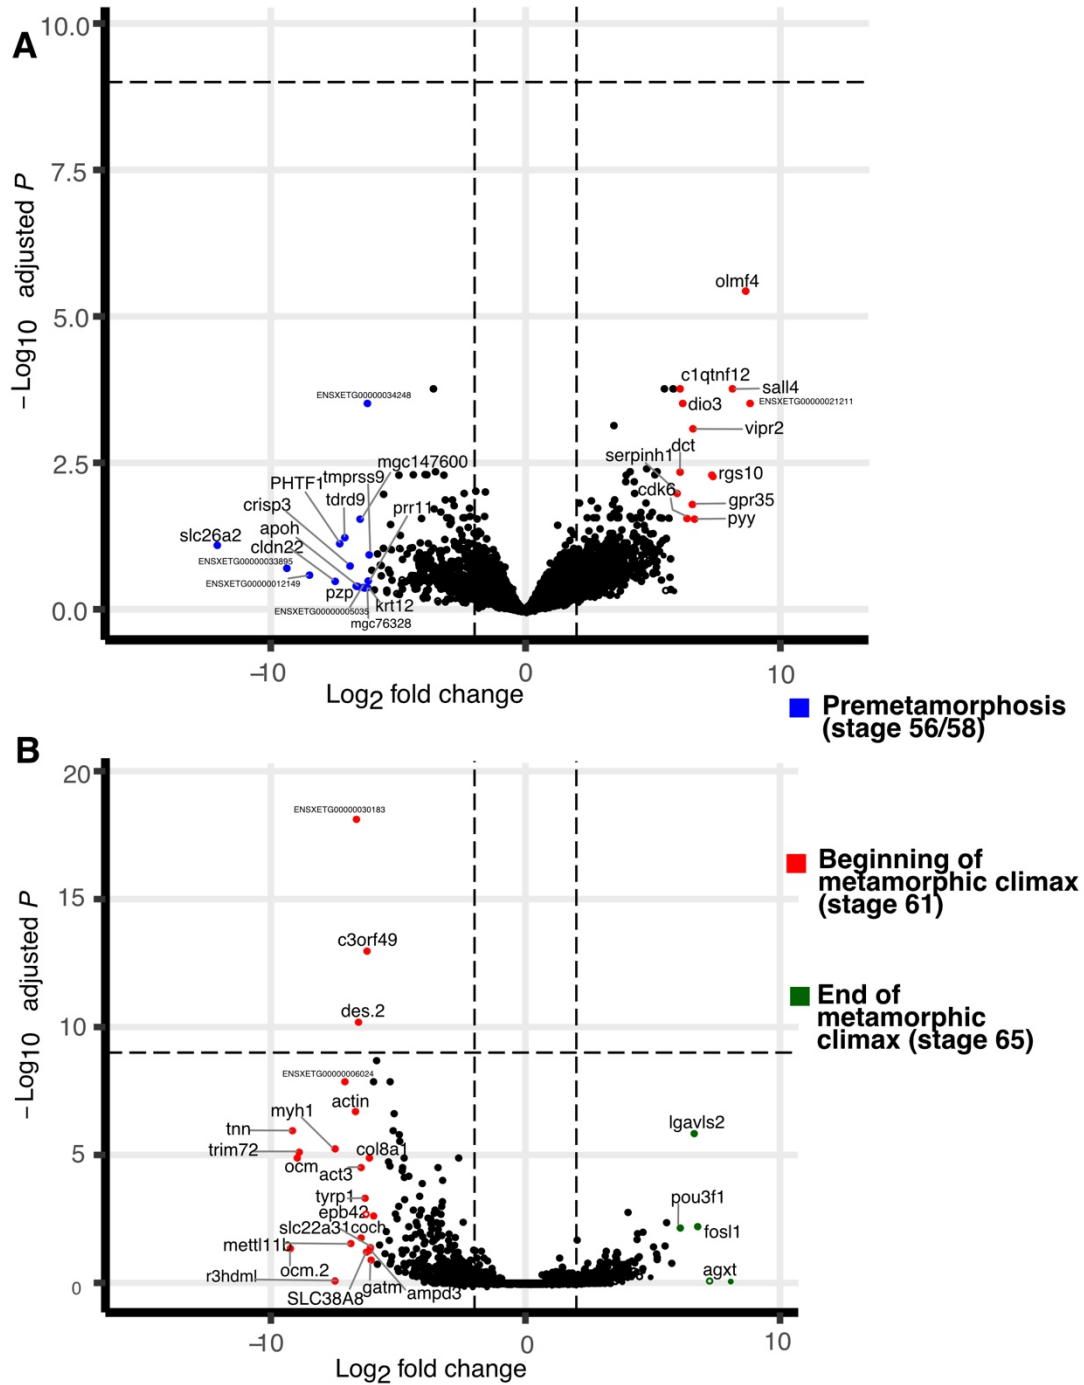

1070

1071

1072

1073

**Figure S3: Volcano plot showing differentially expressed genes across three developmental time points, during the formation of the urostyle ( $P < 0.05$ ,  $FDR < 0.01$ ).**



1074  
1075

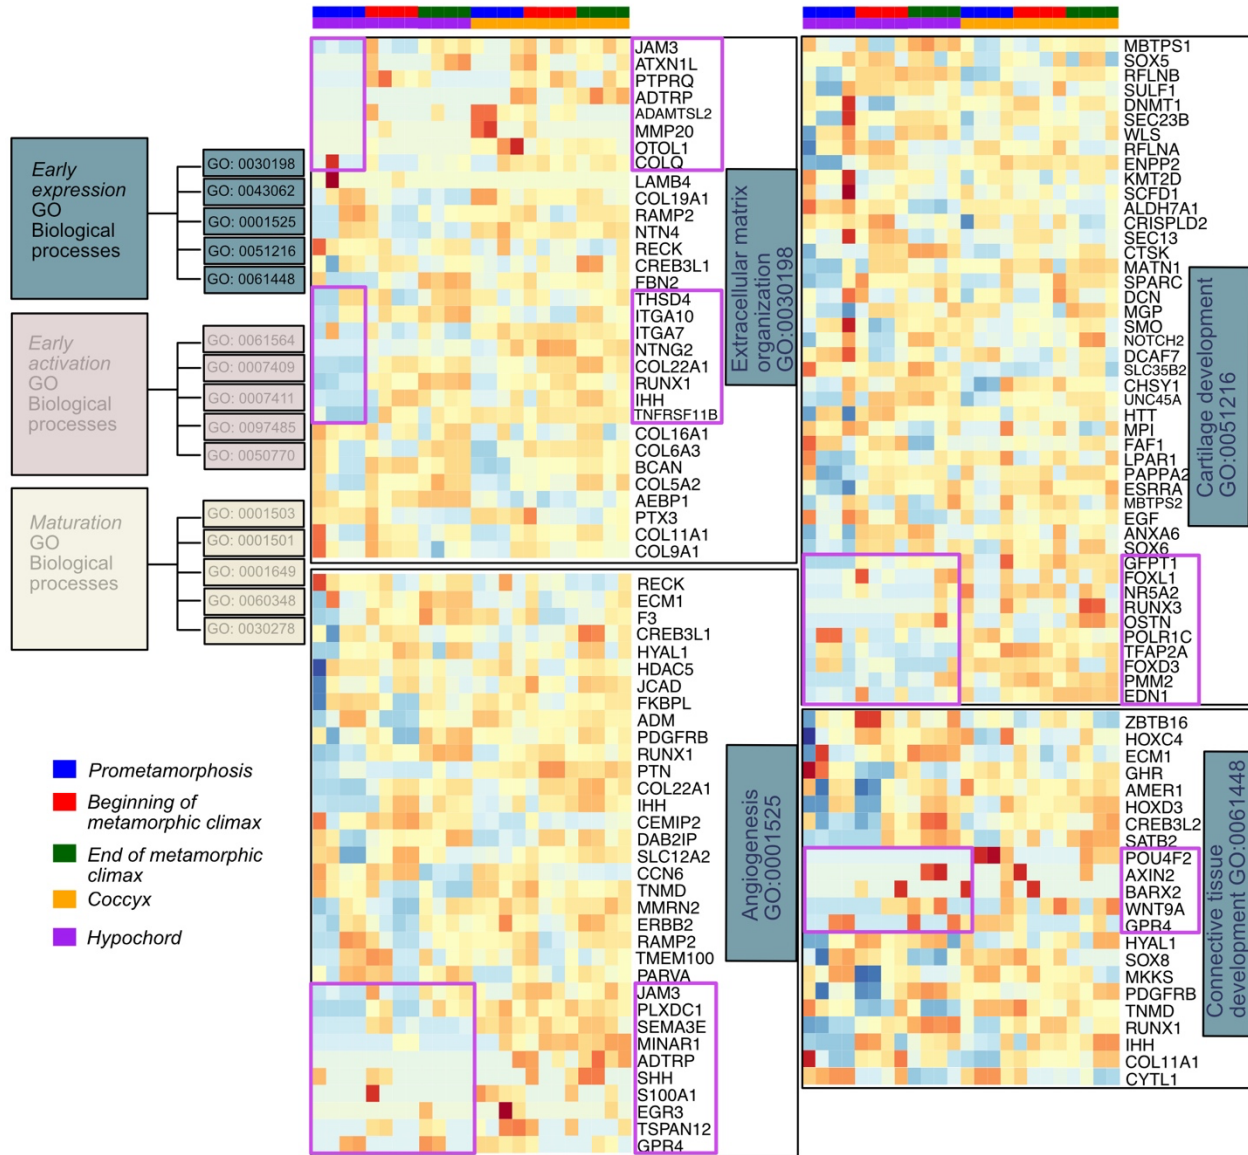

**Figure S4: Heatmaps showing differentially expressed genes involved in GO functions belonging to the “Early expression cluster” of osteocyte differentiation.** Significant genes of the osteocyte transcriptome are divided into three clusters (Youlten et al. 2021). This cluster includes the GO functions Extracellular matrix organization, Angiogenesis, Cartilage development, and Connective tissue development. Genes of interest that are differentially expressed between the coccyx and hypochord are highlighted in purple color.

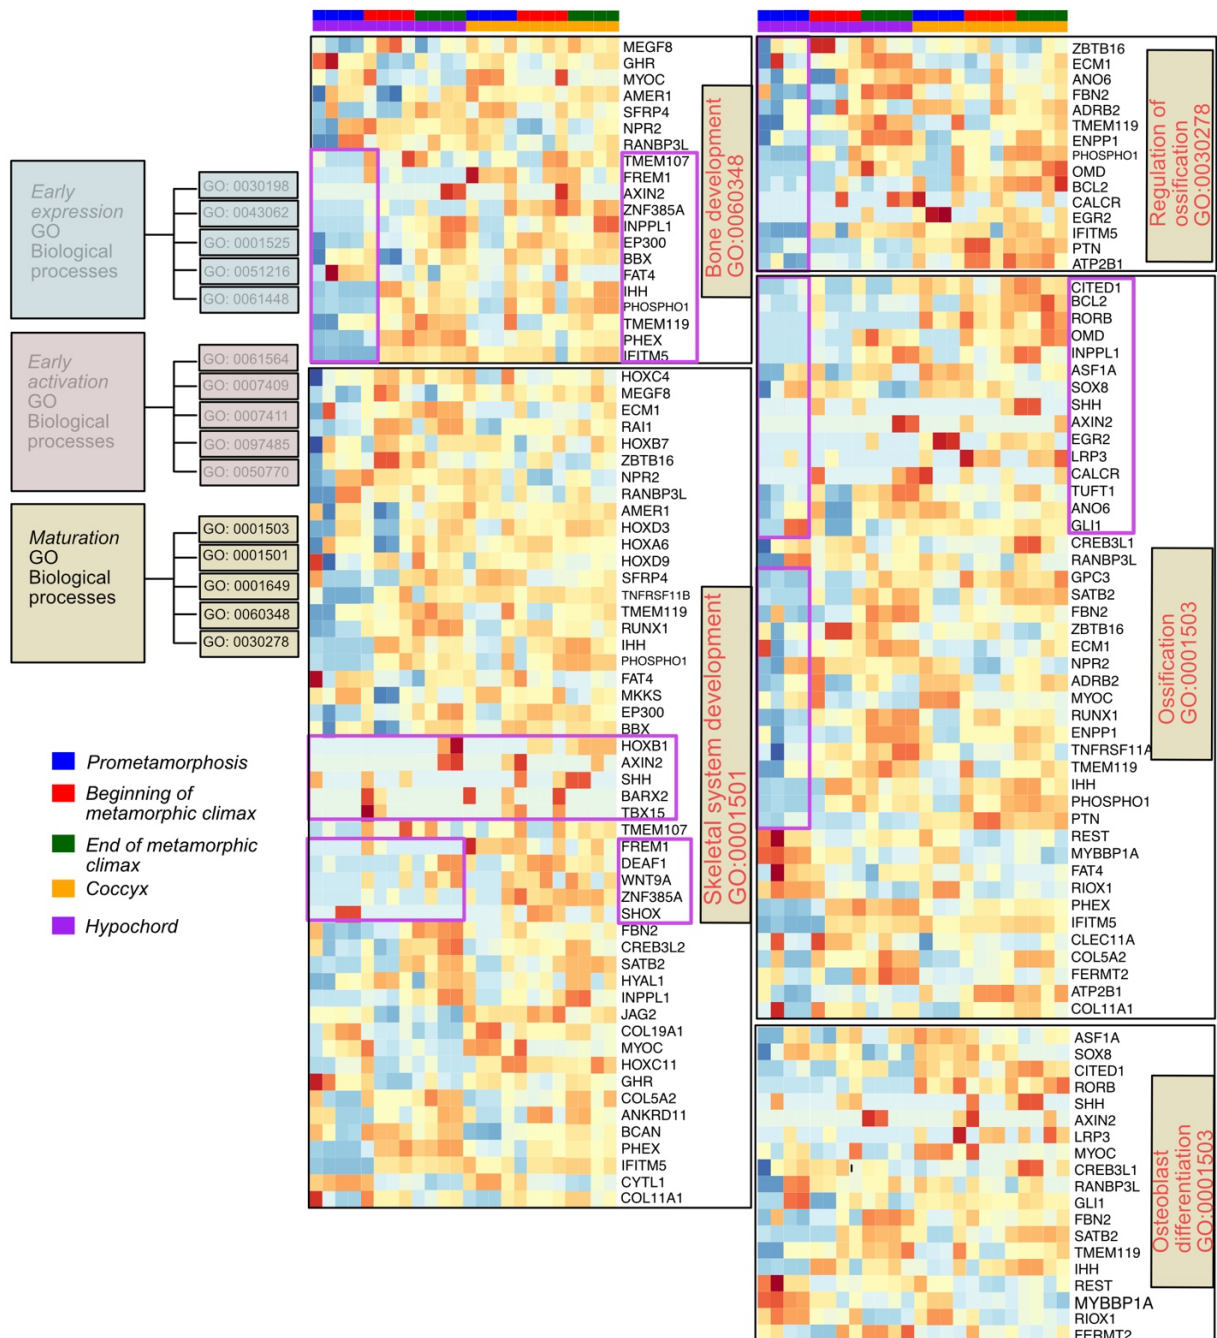

**Figure S5: Heatmaps showing differentially expressed genes involved in GO functions belonging to the “Maturation cluster” of osteocyte differentiation.** Significant genes of the osteocyte transcriptome are divided into three clusters (Youlten et al. 2021). This cluster includes the GO functions Bone development, Skeletal system development, Osteoblast differentiation, Ossification, and Regulation of ossification. Genes of interest that are differentially expressed between the coccyx and hypochord are highlighted in purple color.
